# Supplementary material
Source: MDPI journal article supplement (https://www.mdpi.com/2411-5134/3/2/21)
Supplement: s1 [file s1]

Archive with 4 entries (4 files):
- Video S2_Asteomizole 5uM_72hpf.MOV
- Figure S1.png
- supplementary protocol.pdf
- Video S1_WT control_72hpf.MOV
