# Supplementary material
Source: MDPI journal article supplement (https://www.mdpi.com/2411-5134/3/2/21)
Supplement: s1 [file s1 › supplementary protocol.pdf]

**Supplementary protocol for article:**

## **A simple ImageJ-based method to measure cardiac rhythm in Zebrafish embryos**

Bonifasius Putera Sampurna <sup>1</sup> , Gilbert Audira <sup>1</sup> , Stevhen Juniardi <sup>1</sup>

Yu-Heng Lai <sup>2,#</sup> and Chung-Der Hsiao <sup>1,3,4, #</sup>

Department of Bioscience Technology, Chung Yuan Christian University, Chung-Li, Taiwan.

Department of Chemistry, Chinese Culture University, Taipei, Taiwan

Center of Nanotechnology, Chung Yuan Christian University, Chung-Li, Taiwan.

Center of Biomedical Technology, Chung Yuan Christian University, Chung-Li, Taiwan.

Address correspondence to:

Yu-Heng Lai, Department of Chemistry, Chinese Culture University, 11114 Taipei, Taiwan, Email: [lyh21@ulive.pccu.edu.tw](mailto:lyh21@ulive.pccu.edu.tw)

Chung-Der Hsiao, Department of Bioscience Technology, Chung Yuan Christian University 32023 Chung-Li Taiwan, E-mail: [cdhsiao@cycu.edu.tw](mailto:cdhsiao@cycu.edu.tw)

# Required Software

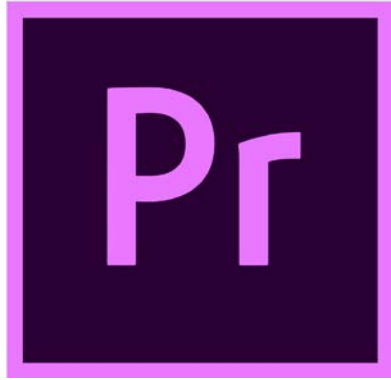

adobe premiere

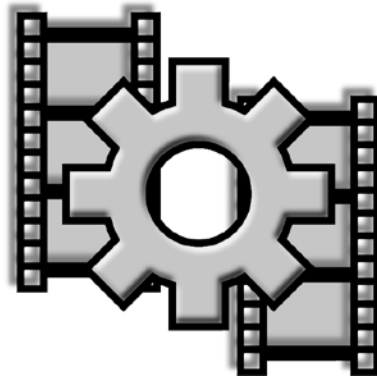

VirtualDub

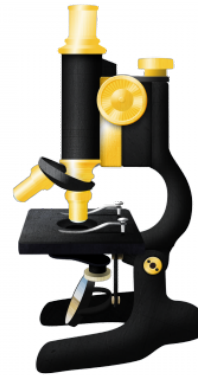

ImageJ

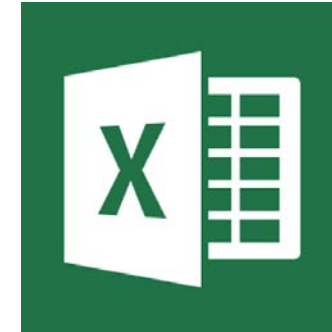

Excel

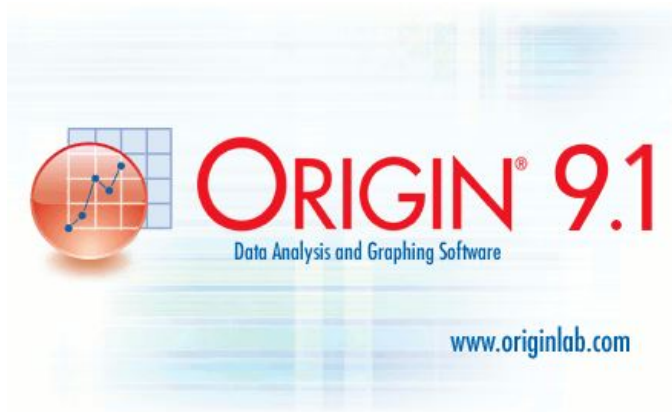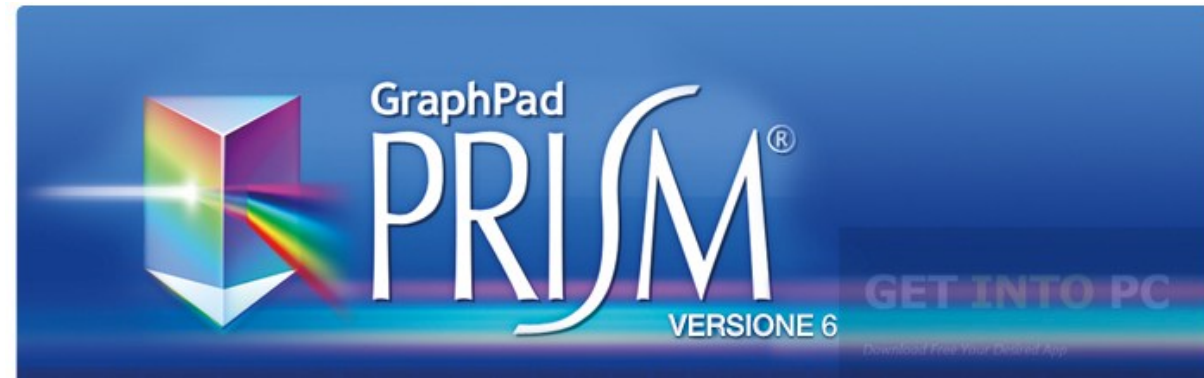

# Cardiac rhythm analysis pipeline

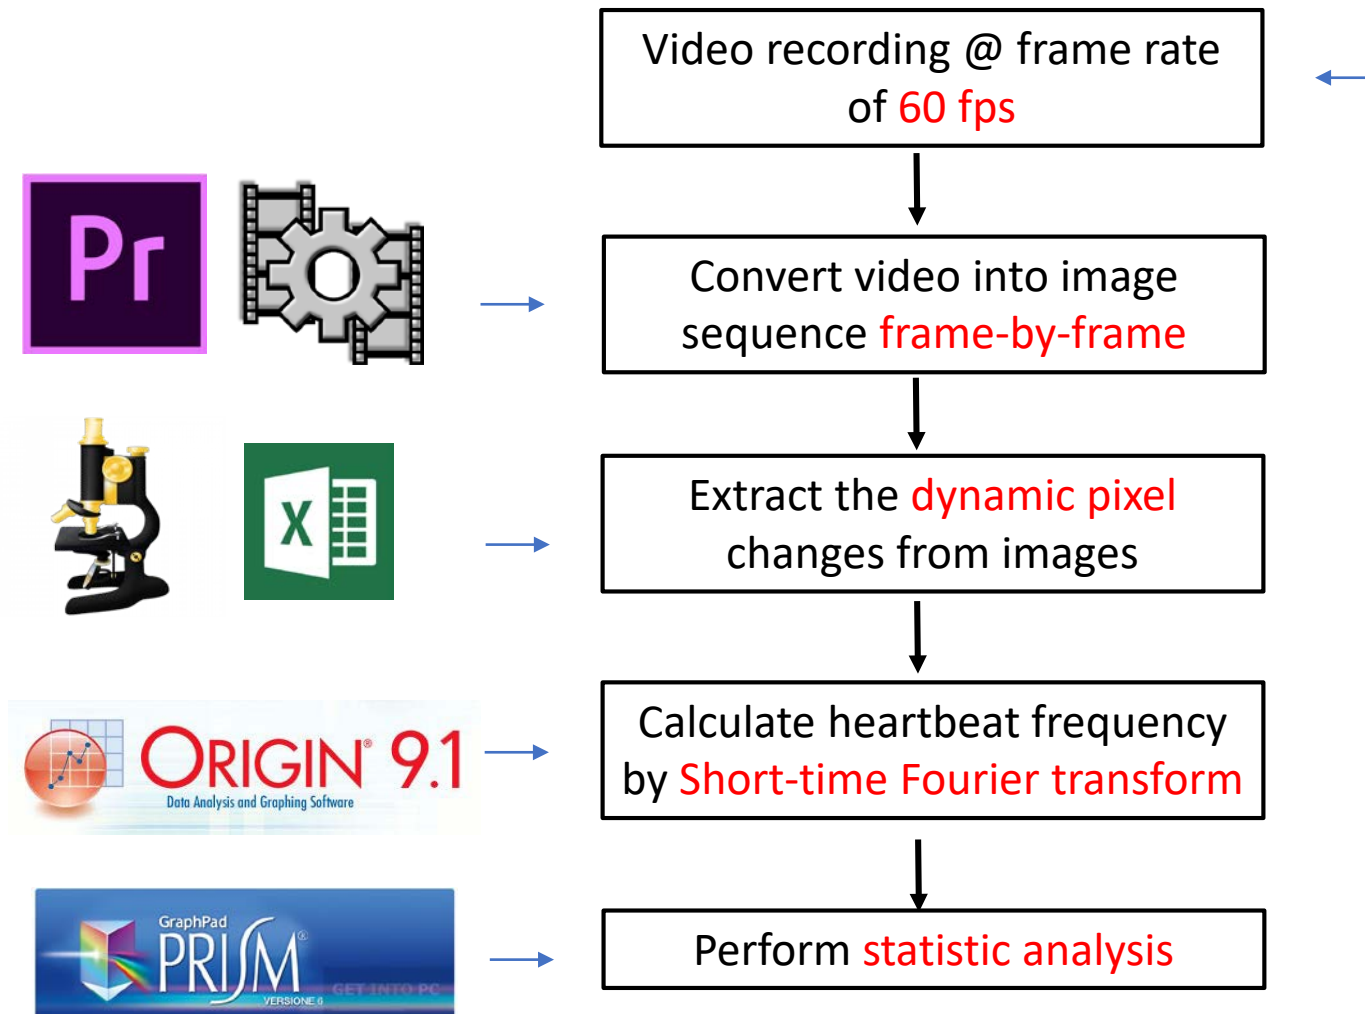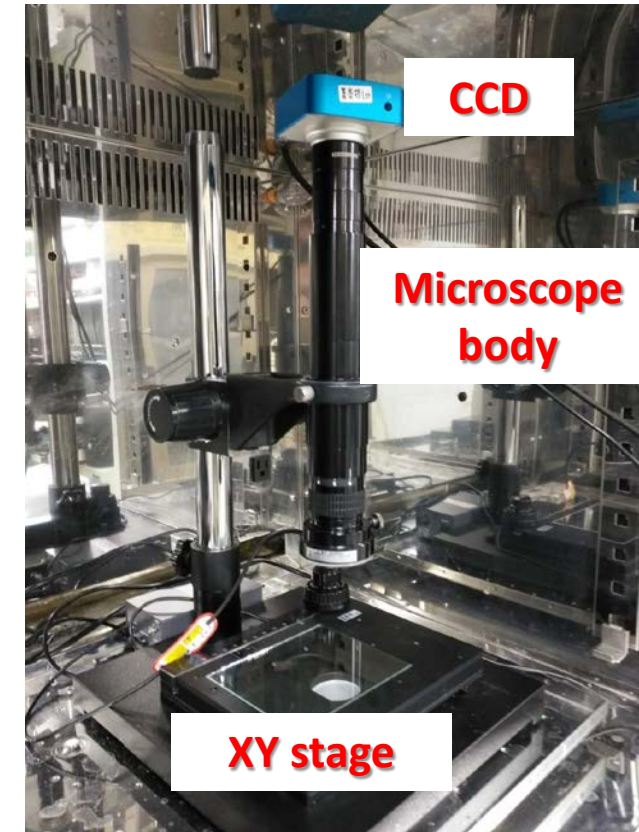

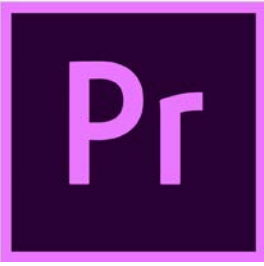

# Checking Interesting Time Point

- Drag Video File to Adobe Premiere
- Click **Ctrl+N** to make sequence
- Check interesting time point

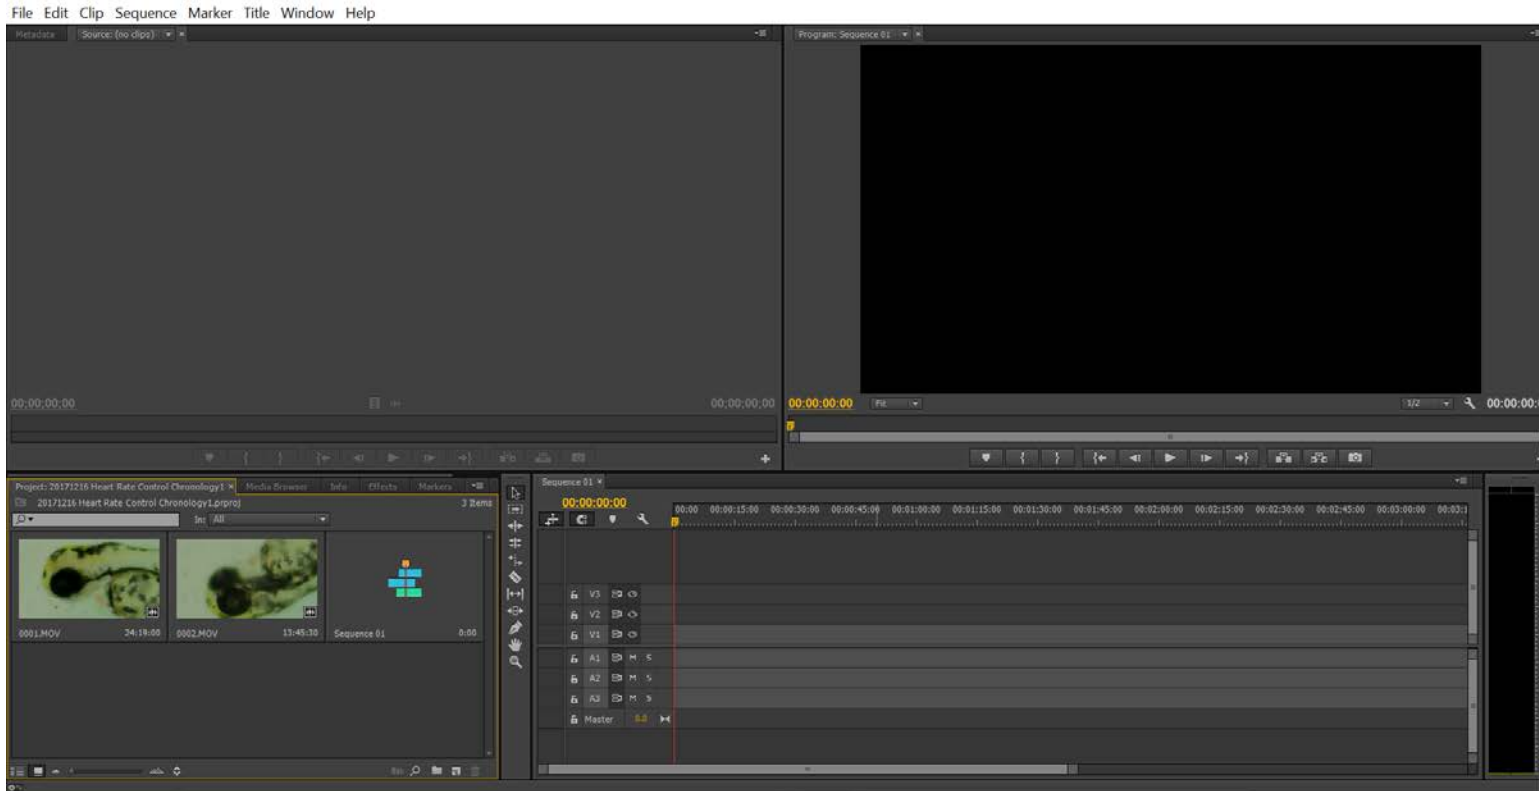



# Export Video File

- Click **Ctrl+M** to render video
- Select **AVI** video format
- Set in and out point to determine video length and point
- Click export to render the video

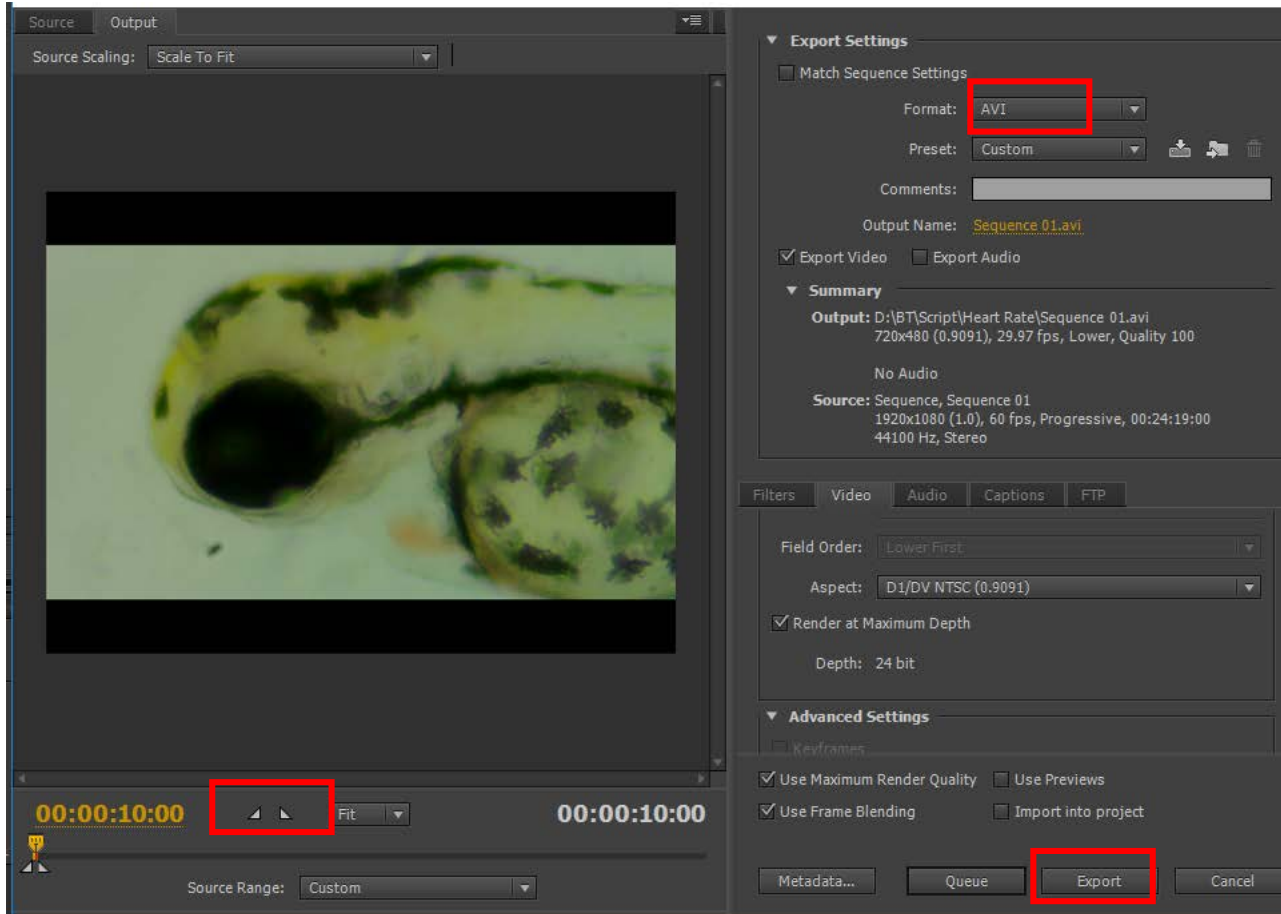

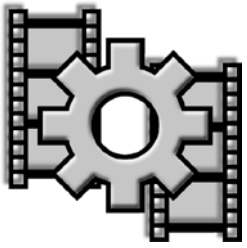

# Convert to Uncompressed Format in VirtualDub

VirtualDub 1.10.4 (build 35491/release-AMD64) by Avery Lee

File Edit View Go Video Audio Options Tools Help

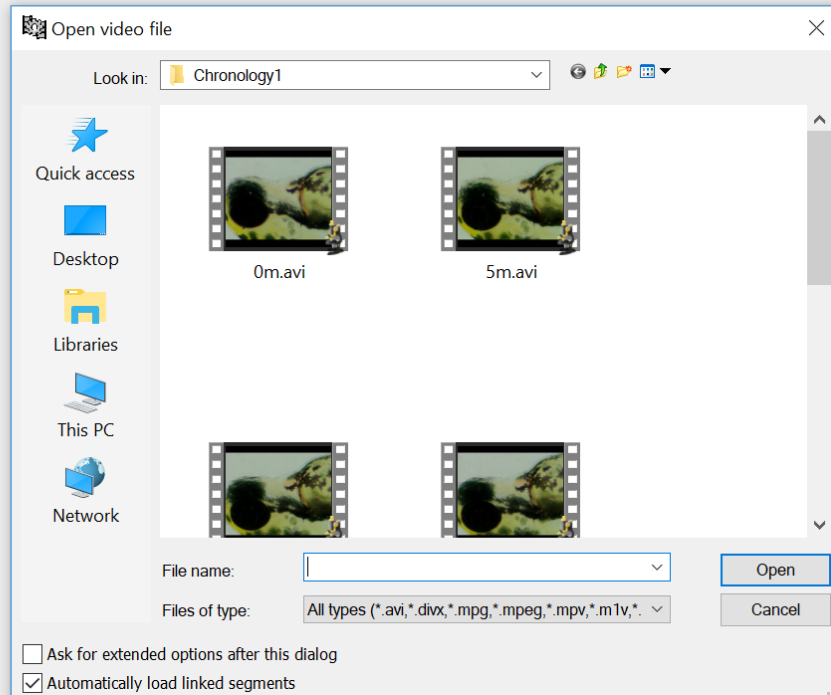

- Click **Ctrl+O** to select the video file
- Click **F7** function key to convert the file format to uncompressed AVI

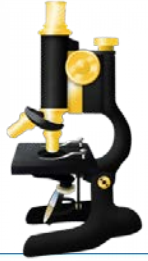

# Open the Video File with ImageJ

- Click File + Open to Select Video File
- Select the VirtualDub converted video
- In AVI Reader of ImageJ, choose the frames selected and uncheck all the boxes

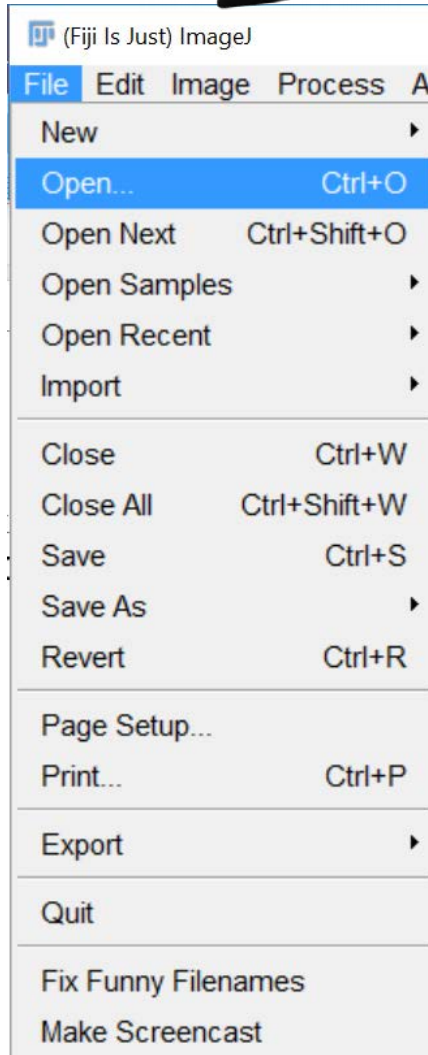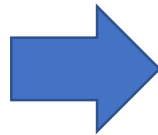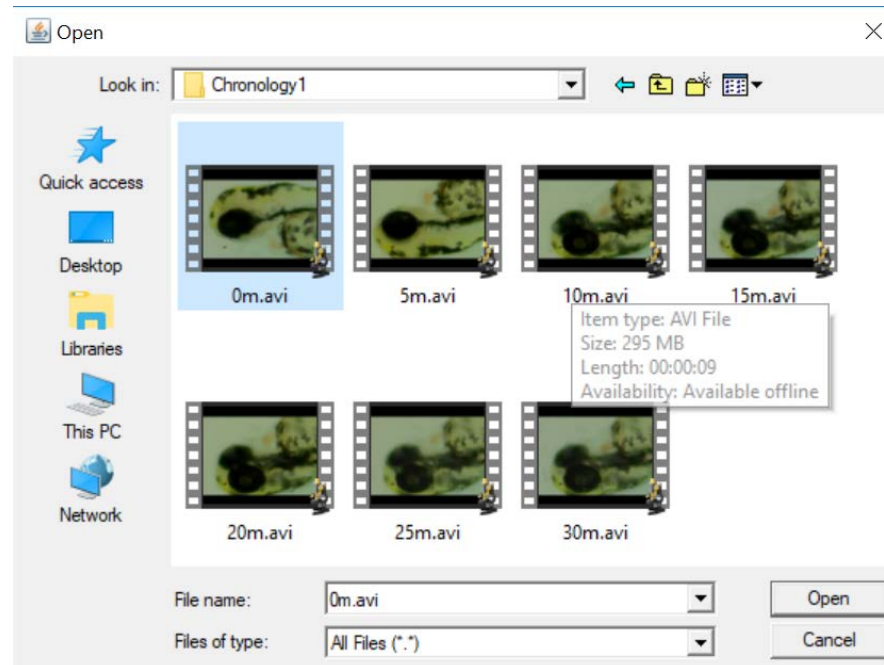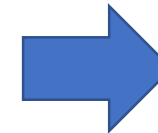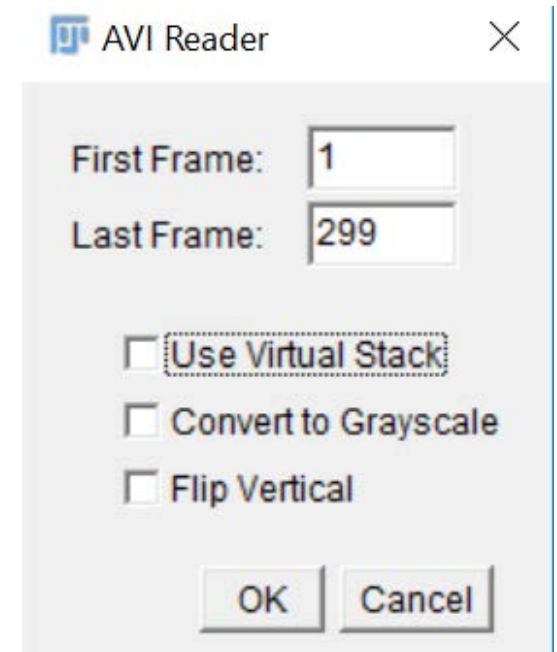

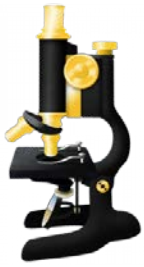

# Select Region of Interesting (ROI) in **ImageJ**

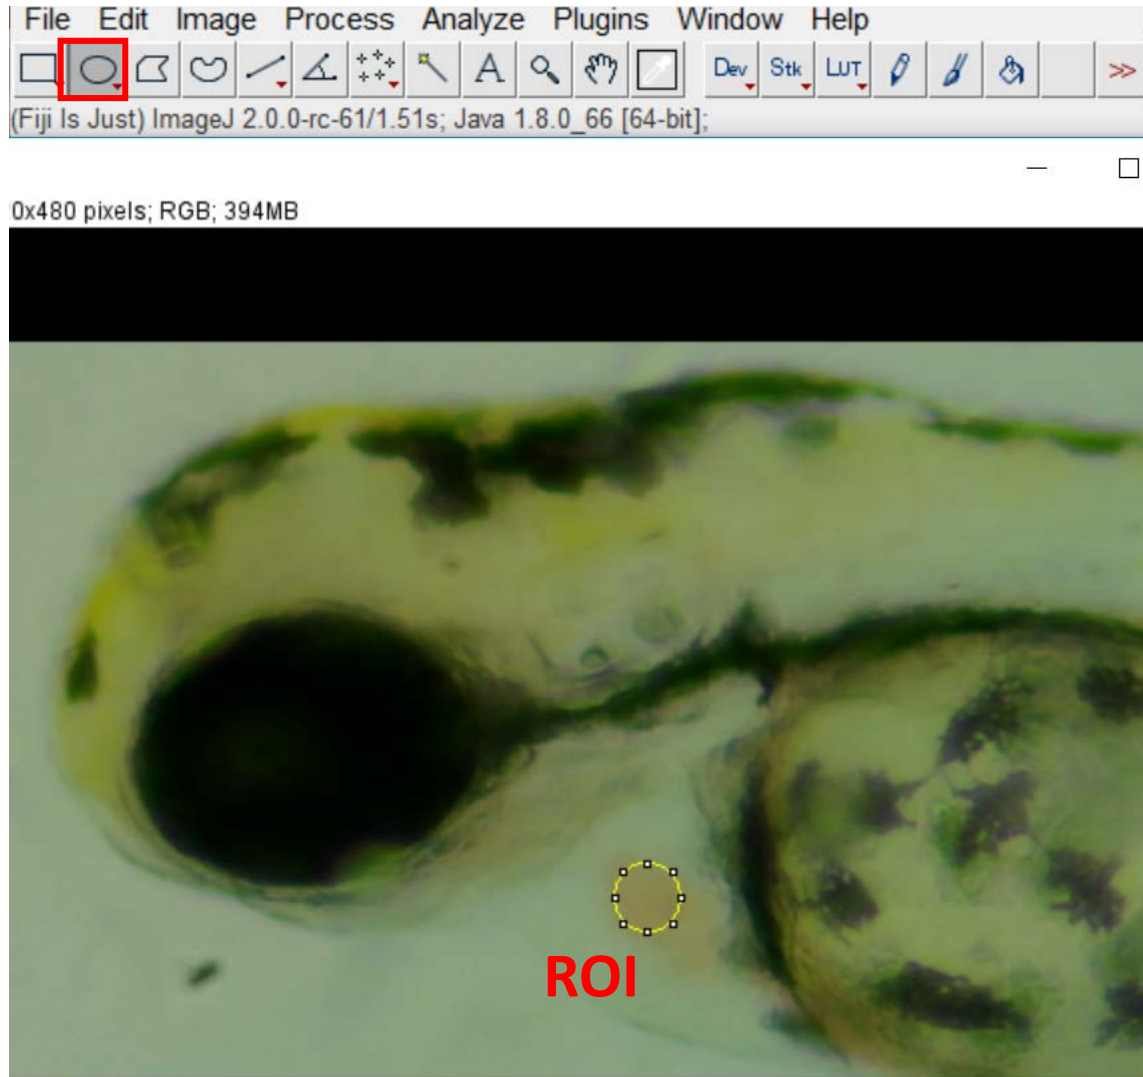

- Use **\*Oval\*** brush selection to choose ROI in specific heart area (**atrium** or **ventricle** regions)
- The ROI can be specified in atrium, ventricle or the entire heart region to measure the beating rate



# Use Time Series Analyzer V3 Plugin

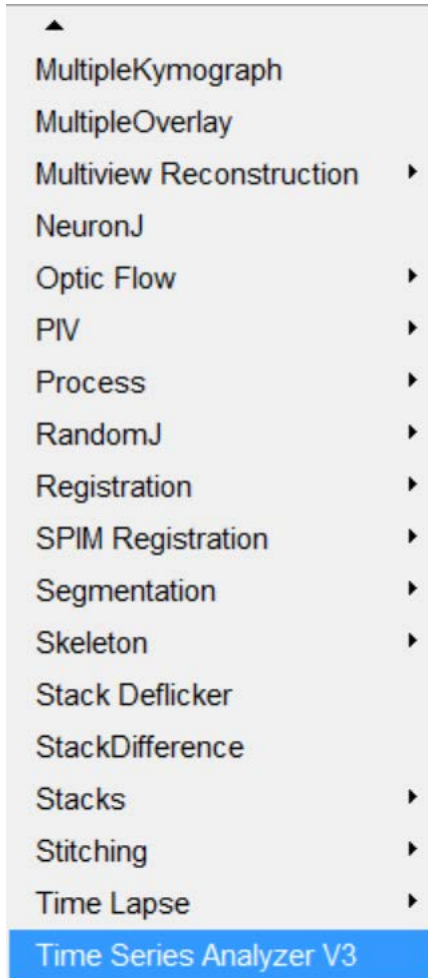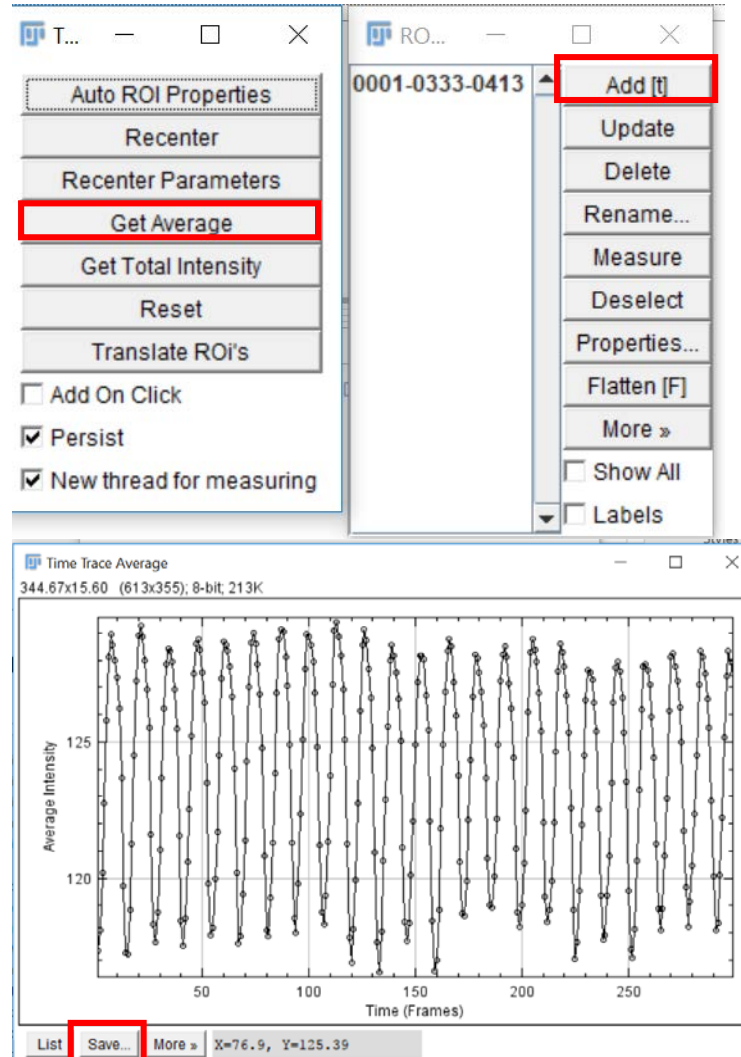

- Choose **Time Series Analyzer V3** plugin
- Click **“Add”** Button to choose ROI
- Click **“Get Average”** to get the peak and data
- Click **“Save”** in the peak window to keep the data for further analysis
- After this analysis, the **dynamic pixel change** can be extracted

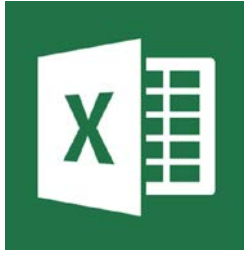

# Combine the data in Microsoft Excel

|    | A        | B        | C           | D         | E              | F        | G        | H        |
|----|----------|----------|-------------|-----------|----------------|----------|----------|----------|
| 1  | Time     | A0m      | A5m         | A10m      | A15m           | A20m     | A25m     | A30m     |
| 2  | 0.034483 | 132.5756 | 121.4167    | 123.9664  | 122.8646       | 125.3867 | 123.1311 | 122.1574 |
| 3  | 0.068966 | 128.7311 | 122.8802    | 123.4888  | 122.1146       | 129.4767 | 122.9726 | 121.9028 |
| 4  | 0.103448 | 127.563  | 122.1198    | 121.5336  | 120.2188       | 130.7767 | 122.1037 | 123.6852 |
| 5  | 0.137931 | 125.5168 | 122.375     | 120.1716  | 119.0156       | 131.5533 | 121.2896 | 128.8981 |
| 6  | 0.172414 | 124.3739 | 125.1667    | 120.3134  | 120.401        | 131.0167 | 121.247  | 129.9722 |
| 7  | 0.206897 | 124.1513 | 128.7031    | 122.0821  | 121.0365       | 129.0267 | 122.9085 | 131.5417 |
| 8  | 0.241379 | 124.1807 | 125.9323    | 127.0597  | 122.0052       | 126.82   | 123.8781 | 129.9769 |
| 9  | 0.275862 | 123.958  | 123.9063    | 128.5858  | 124.3073       | 125.2167 | 125.1189 | 128.0509 |
| 10 | 0.310345 | 123.5168 | 124.1719    | 130.2798  | 125.1406       | 124.35   | 125.064  | 125.0926 |
| 11 | 0.344828 | 124.4118 | 123.724     | 130.7948  | 126.8594       | 122.7067 | 124.3598 | 124.0509 |
| 12 | 0.37931  | 126.4958 | 122.8646    | 129.2761  | 126.0052       | 122.0633 | 123.0732 | 123.1204 |
| 13 | 0.413793 | 127.6597 | 122.5781    | 125.6381  | 123.2135       | 121.5433 | 122.8323 | 122.3426 |
| 14 | 0.448276 | 129.521  | 122.2083    | 124.8396  | 123.3802       | 121.1567 | 122.9634 | 122.1019 |
| 15 | 0.482759 | 131.6765 | 120.2292    | 124.944   | 123.6563       | 124.1267 | 122.6707 | 121.2176 |
| 16 | 0.517241 | 131.1513 | 122.0781    | 124.7351  | 123.4792       | 129.56   | 122.5884 | 121.2222 |
| 17 | 0.551724 | 128.3571 | 122.724     | 123.5485  | 122.4688       | 130.1433 | 122.439  | 123.9722 |
| 18 | 0.586207 | 127.1218 | 122.6615    | 122.7612  | 121.6146       | 131.5367 | 121.7134 | 129.2593 |
| 19 | 0.62069  | 126.4706 | 125.4844    | 121.1903  | 119.8854       | 130.96   | 121.2409 | 130.1667 |
| 20 | 0.655172 | 125.3698 | 129.099     | 123.0336  | 121.8698       | 129.2133 | 121.8445 | 131.4306 |
| 21 | 0.689655 | 124.4664 | 125.9948    | 126.7873  | 122.151        | 128.1967 | 123.2622 | 129.1481 |
| 22 | 0.724138 | 123.6261 | 124.6875    | 128.806   | 124.5521       | 125.8767 | 125.0549 | 126.0833 |
|    |          | Atrium   | Atrium Peak | Ventricle | Ventricle Peak |          |          |          |

- Make 4 sheets in Excel:

Atrium and Ventricle (from Plugin). Atrium Peak and Ventricle Peak sheets for further analysis

- Time obtained from frame/29

(the video recording speed is 60 fps, but after video output by Adobe Premiere the speed reduce to 29 fps)

# Input The Data Into Origin 9.1

|           | A(X)    | B(Y)    | C(Y)      | D(Y)      | E(Y)      | F(Y)      | G(Y)      | H(Y)      |
|-----------|---------|---------|-----------|-----------|-----------|-----------|-----------|-----------|
| Long Name |         |         |           |           |           |           |           |           |
| Units     |         |         |           |           |           |           |           |           |
| Comments  |         |         |           |           |           |           |           |           |
| F(x)      | Time    | A0m     | A5m       | A10m      | A15m      | A20m      | A25m      | A30m      |
| 1         | 0.03448 | 117.945 | 125.6875  | 123.8114  | 129.58713 | 128.93047 | 132.49193 | 131.32558 |
| 2         | 0.06897 | 117.985 | 124.28438 | 123.11404 | 129.23106 | 128.23178 | 132.46774 | 131.59302 |
| 3         | 0.10345 | 117.705 | 123.25938 | 122.82895 | 128.87122 | 127.28146 | 132.66936 | 131.41861 |
| 4         | 0.13793 | 116.99  | 122.6375  | 122.46491 | 128.35606 | 126.27152 | 132.5242  | 131.84883 |
| 5         | 0.17241 | 117.82  | 122.65938 | 122.30264 | 127.28409 | 125.30132 | 132.57259 | 132.15117 |
| 6         | 0.2069  | 122.01  | 122.3     | 121.83334 | 125.98106 | 124.93378 | 132.06451 | 132.32558 |
| 7         | 0.24138 | 124.96  | 122.0125  | 124.42105 | 125.5303  | 124.2649  | 131.54033 | 132.08139 |
| 8         | 0.27586 | 125.595 | 123.91563 | 128.38597 | 124.67424 | 124.15232 | 130.85484 | 131.63954 |
| 9         | 0.31034 | 125.495 | 127.95    | 128.24562 | 123.88636 | 124.98676 | 129.79839 | 131.23256 |
| 10        | 0.34483 | 124.975 | 128.11563 | 128.26315 | 123.44697 | 129.96358 | 128.96774 | 130.37209 |
| 11        | 0.37931 | 124.545 | 128.24063 | 128.17105 | 124.61364 | 130.37418 | 127.77419 | 129.31395 |
| 12        | 0.41379 | 123.485 | 127.90625 | 127.57456 | 129.77652 | 130.75497 | 127.22581 | 128.44186 |
| 13        | 0.44828 | 121.5   | 127.61875 | 126.16228 | 129.73485 | 130.44371 | 127.02419 | 128.63954 |
| 14        | 0.48276 | 120.405 | 126.99062 | 125.11842 | 129.49243 | 130.00331 | 127.03226 | 132.03488 |
| 15        | 0.51724 | 118.97  | 125.84375 | 124.0307  | 128.97728 | 129.70198 | 129.68549 | 131.51163 |
| 16        | 0.55172 | 118.45  | 124.93437 | 122.71053 | 128.75    | 128.56291 | 131.58871 | 132.01163 |
| 17        | 0.58621 | 118.615 | 124.36875 | 122.20175 | 127.84849 | 127.38742 | 131.95967 | 131.94186 |
| 18        | 0.62069 | 117.65  | 124.11875 | 121.4079  | 127.26894 | 126.41722 | 131.51613 | 132.11627 |
| 19        | 0.65517 | 118.66  | 123.50625 | 120.36404 | 125.76515 | 126.03642 | 131.89516 | 132.61627 |
| 20        | 0.68966 | 122.85  | 122.93125 | 120.35526 | 124.95454 | 125.46027 | 131.10484 | 132.54651 |
| 21        | 0.72414 | 125.17  | 122.79688 | 127.16228 | 124.43561 | 125.00662 | 130.20161 | 132.6628  |
| 22        | 0.75862 | 125.54  | 127.28125 | 128.58333 | 123.27273 | 124.27483 | 129.32259 | 132.34883 |
| 23        | 0.7931  | 125.515 | 128.59688 | 128.75    | 122.64015 | 126.82119 | 128.32259 | 131.89536 |
| 24        | 0.82759 | 125.13  | 128.51875 | 128.49562 | 122.43182 | 131.04967 | 127.26613 | 130.90698 |
| 25        | 0.86207 | 124.515 | 128.55313 | 128.19298 | 127.06061 | 131.02649 | 126.45968 | 129.32558 |
| 26        | 0.89655 | 122.95  | 128.19063 | 127.64035 | 128.92802 | 130.75829 | 126.18549 | 129.30232 |

- The data matrix is directly copy from Excel and paste to Origin 9.1
- In this case, we perform time chronology analysis of zebrafish embryo heartbeat for 30 min, and calculate the bmp (beat per min) at 0, 5, 10, 15, 20, 25 and 30 min time points.

## Make Graphic by using Origin 9.1

File - D:\BT\Video\2017\December\20171218 Heart Rate Chronology\Excel\20

|           | A(X)    | B(Y)    |
|-----------|---------|---------|
| Long Name |         |         |
| Units     |         |         |
| Comments  |         |         |
| F(x)      | Time    | A0m     |
| 1         | 0.03448 | 117.945 |
| 2         | 0.06897 | 117.985 |
| 3         | 0.10345 | 117.705 |
| 4         | 0.13793 | 116.99  |
| 5         | 0.17241 | 117.82  |
| 6         | 0.2069  | 122.01  |
| 7         | 0.24138 | 124.96  |
| 8         | 0.27586 | 125.595 |
| 9         | 0.31034 | 125.495 |
| 10        | 0.34483 | 124.975 |
| 11        | 0.37931 | 124.545 |
| 12        | 0.41379 | 123.485 |
| 13        | 0.44828 | 121.5   |
| 14        | 0.48276 | 120.405 |
| 15        | 0.51724 | 118.97  |
| 16        | 0.55172 | 118.45  |
| 17        | 0.58621 | 118.615 |
| 18        | 0.62069 | 117.65  |
| 19        | 0.65517 | 118.66  |
| 20        | 0.68966 | 122.85  |
| 21        | 0.72414 | 125.17  |
| 22        | 0.75862 | 125.54  |
| 23        | 0.7931  | 125.515 |
| 24        | 0.82759 | 125.13  |
| 25        | 0.86207 | 124.515 |
| 26        | 0.89655 | 122.95  |

Plot Column Worksheet Analysis Statistics Image Tools Format Window

Line

- Line
- Symbol
- Line + Symbol
- Column/Bar/Pie
- Multi-Curve
- 3D XYY
- 3D Surface
- 3D Symbol/Bar/Vector
- Statistics
- Area
- Contour
- Specialized
- Stock
- User Defined
- Template Library...
- 1 Line
- 2 3D Trajectory
- 3 Colormap Surface with Projection
- 4 Double-Y
- 5 Color Map Surface
- 6 Scatter
- 7 Multiple Y Axes...
- 8 Bar
- 9 Column
- 10 Grouped Columns - Indexed Data...

Horizontal Step  
Vertical Step  
Spline Connected

|      | m         | A15m     | A20m |
|------|-----------|----------|------|
| 3114 | 129.58713 | 128.9304 |      |
| 1404 | 129.23106 | 128.2317 |      |
| 2895 | 128.87122 | 127.2814 |      |
| 5491 | 128.35606 | 126.2715 |      |
| 0264 | 127.28409 | 125.3013 |      |
| 3334 | 125.98106 | 124.9337 |      |
| 2105 | 125.5303  | 124.264  |      |
| 3597 | 124.67424 | 124.1523 |      |
| 4562 | 123.88636 | 124.9867 |      |
| 6315 | 123.44697 | 129.9635 |      |
| 7105 | 124.61364 | 130.3741 |      |
| 7456 | 129.77652 | 130.7549 |      |
| 6228 | 129.73485 | 130.4437 |      |
| 1842 | 129.49243 | 130.0033 |      |
| 0307 | 128.97728 | 129.7019 |      |
| 1053 | 128.75    | 128.5629 |      |
| 0175 | 127.84849 | 127.3874 |      |
| 4079 | 127.26894 | 126.4172 |      |
| 5404 | 125.76515 | 126.0364 |      |
| 5526 | 124.95454 | 125.4602 |      |
| 6228 | 124.43561 | 125.0066 |      |

Sheet1

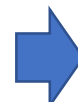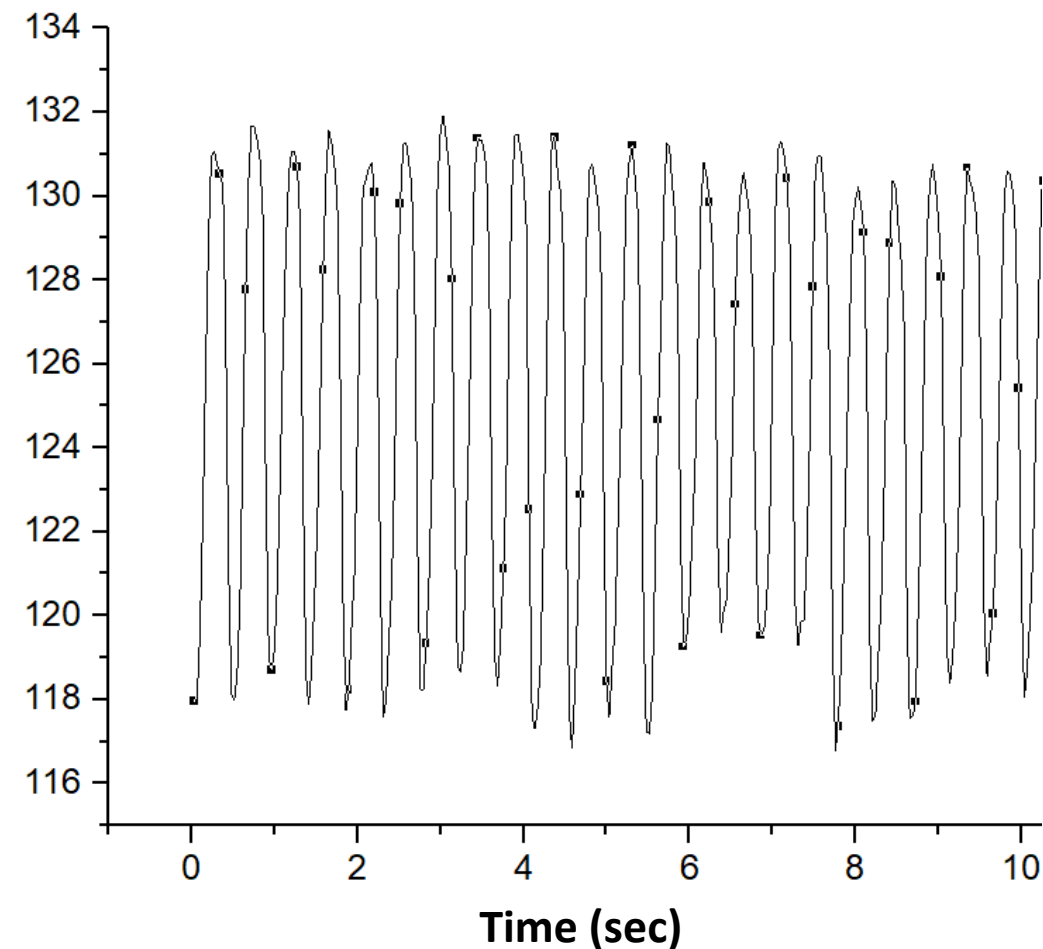

Perform Short-time Fourier transform (STFT) to get heart beat frequency over time changes

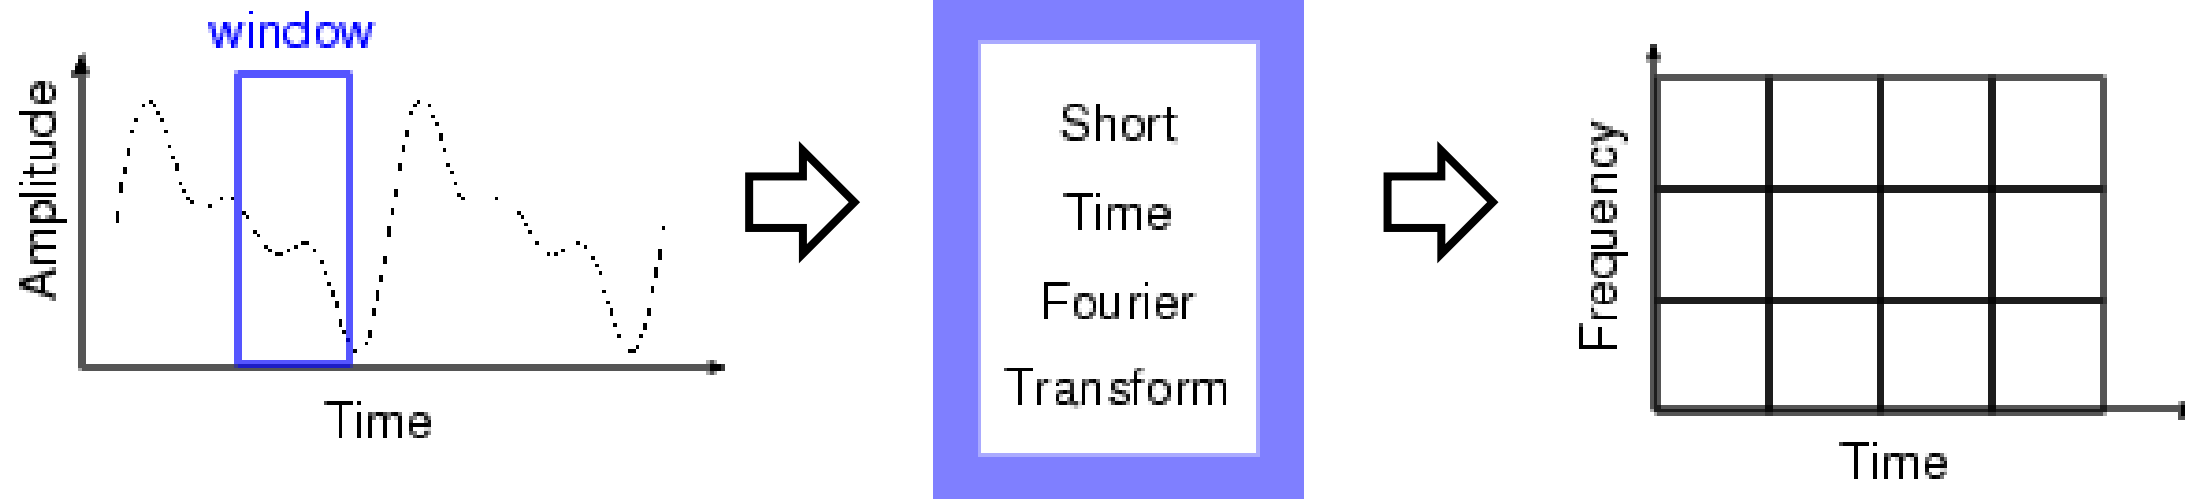

# Perform **STFT** by using Origin 9.1 software

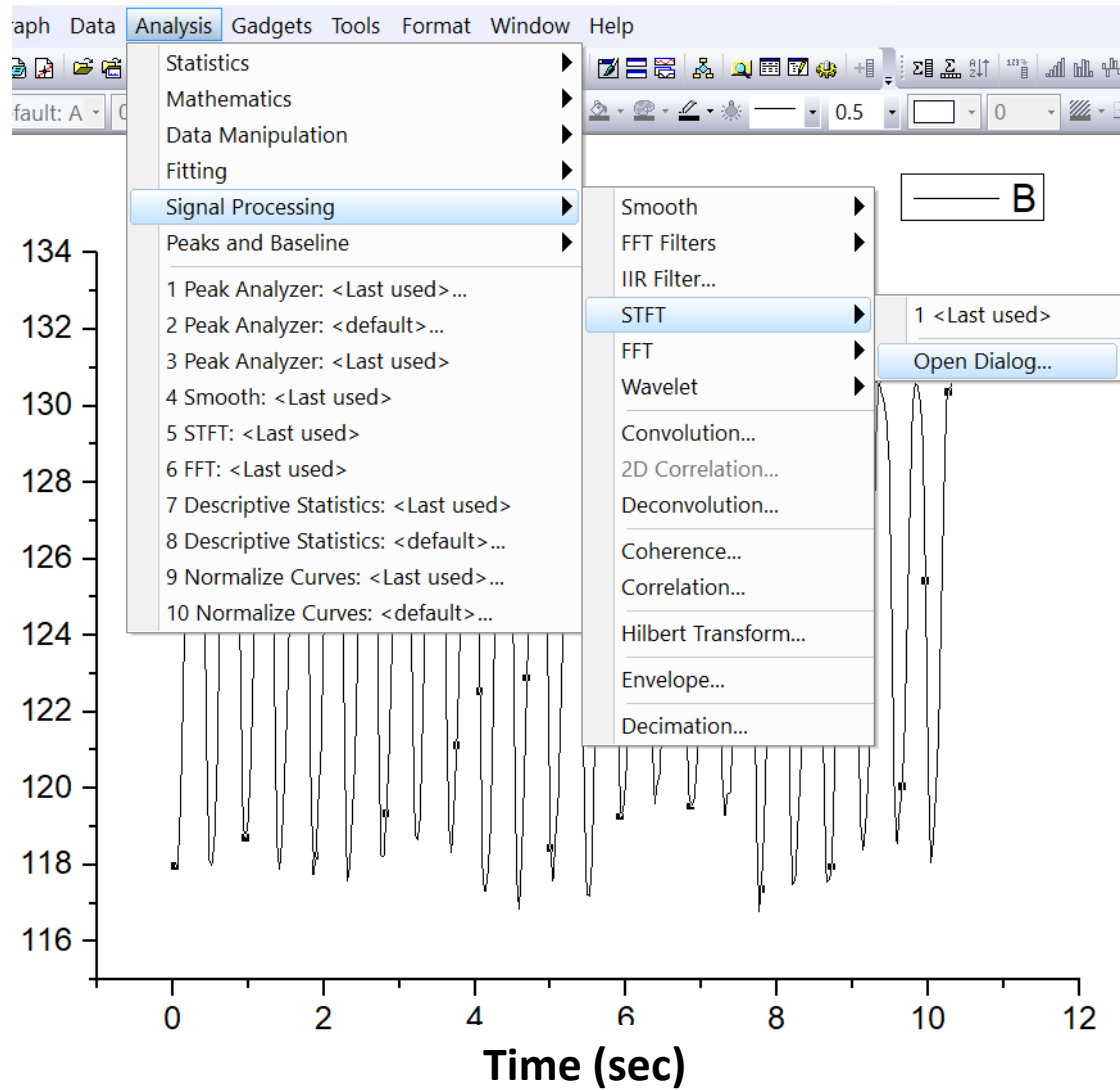

- Click **Analysis** -> **Signal Processing** -> **STFT** -> Open Dialog (for new setup) or <Last used> for previous setup

# Perform **STFT** by using Origin 9.1 software

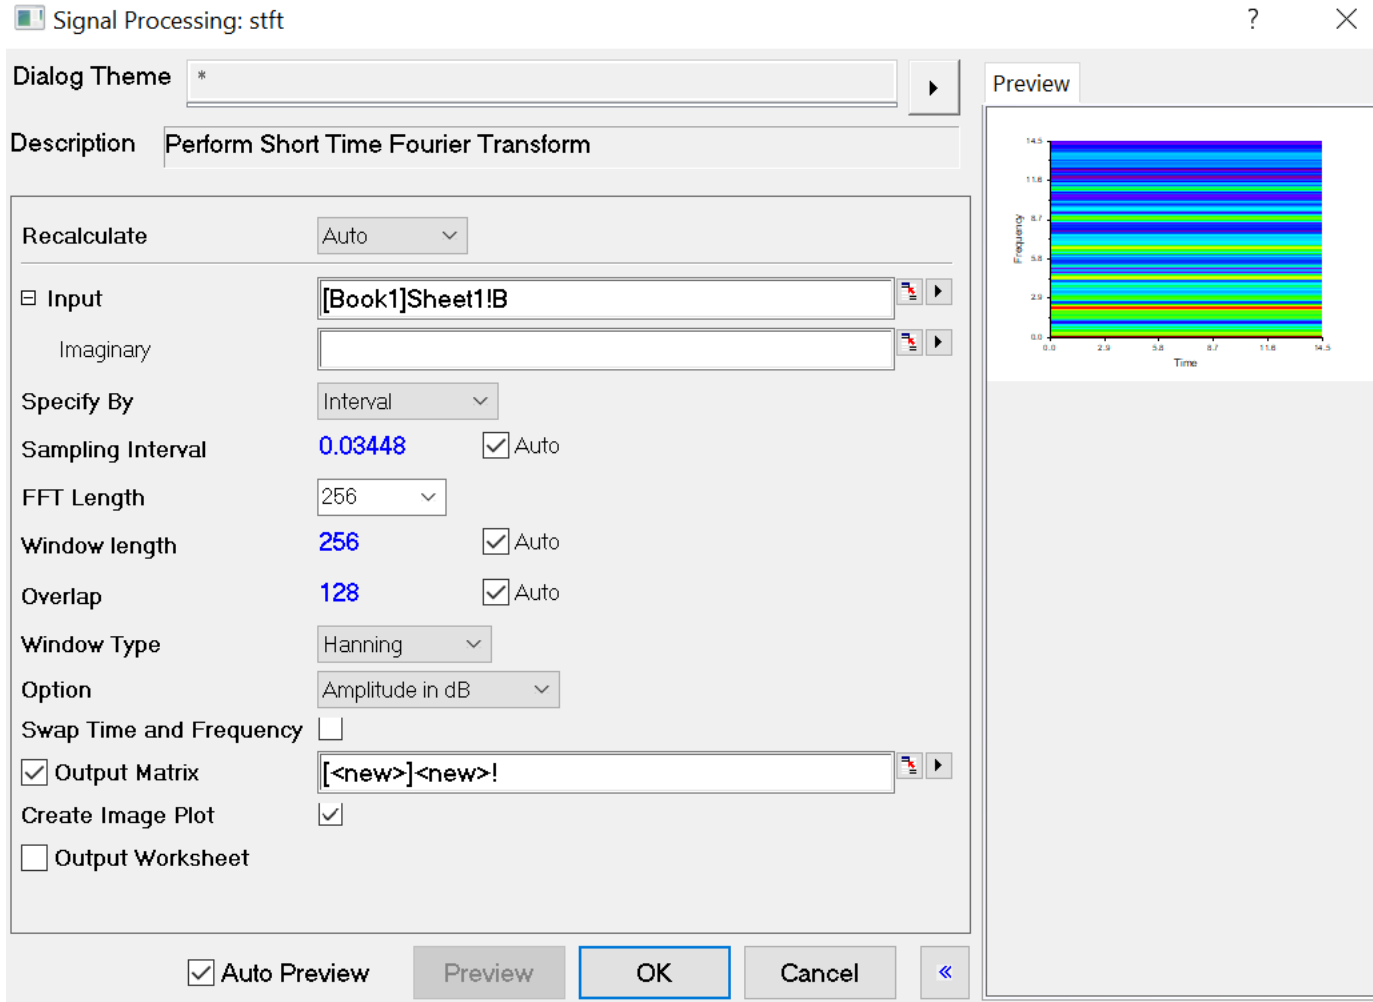

- Change the setup based on the need
- On this experiment, no need to change the parameter (we use the **default setting**)

# Change Scale in **STFT** Result

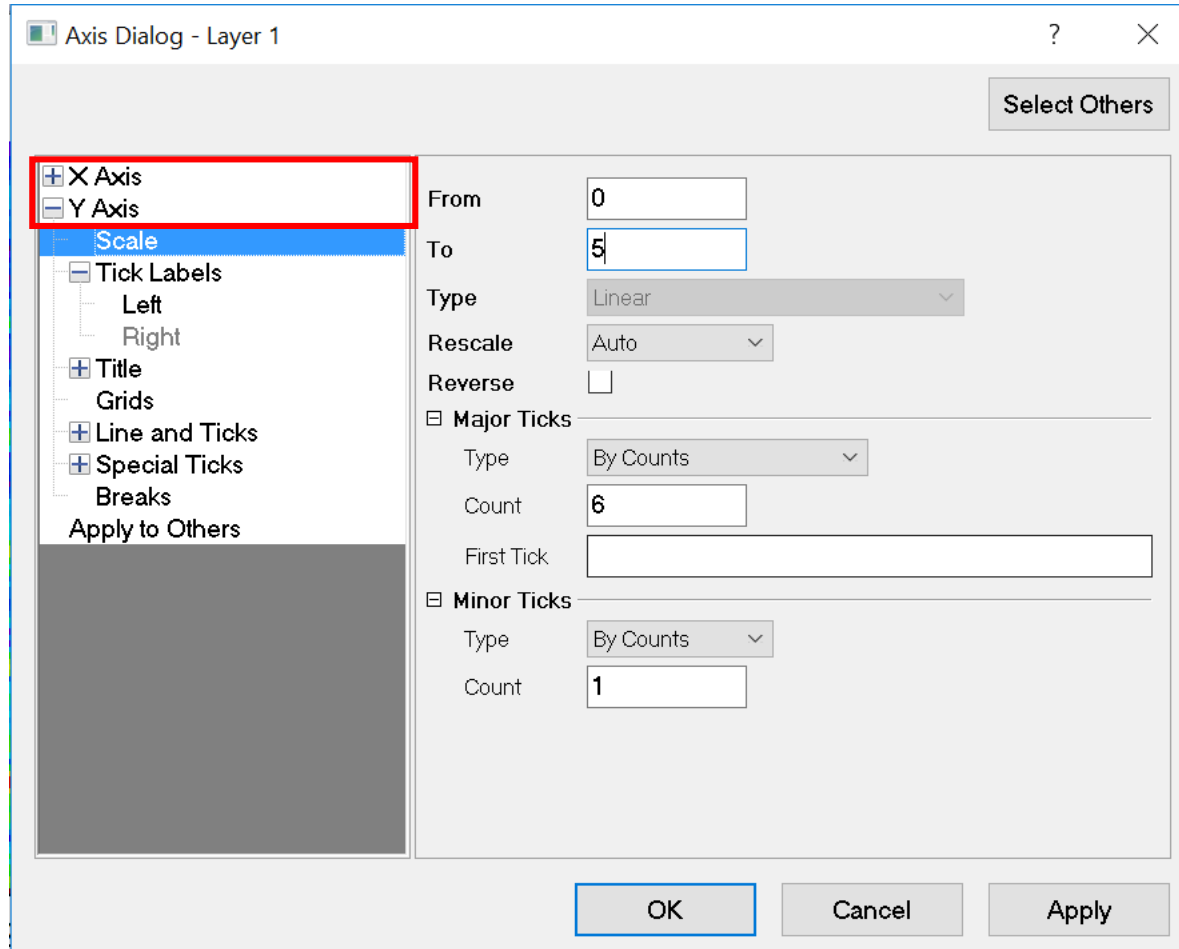

- When the scale range is too wide, it can be adjusted
- To change the X and Y scale double click on the graphic result

# Changed Scale STFT Result

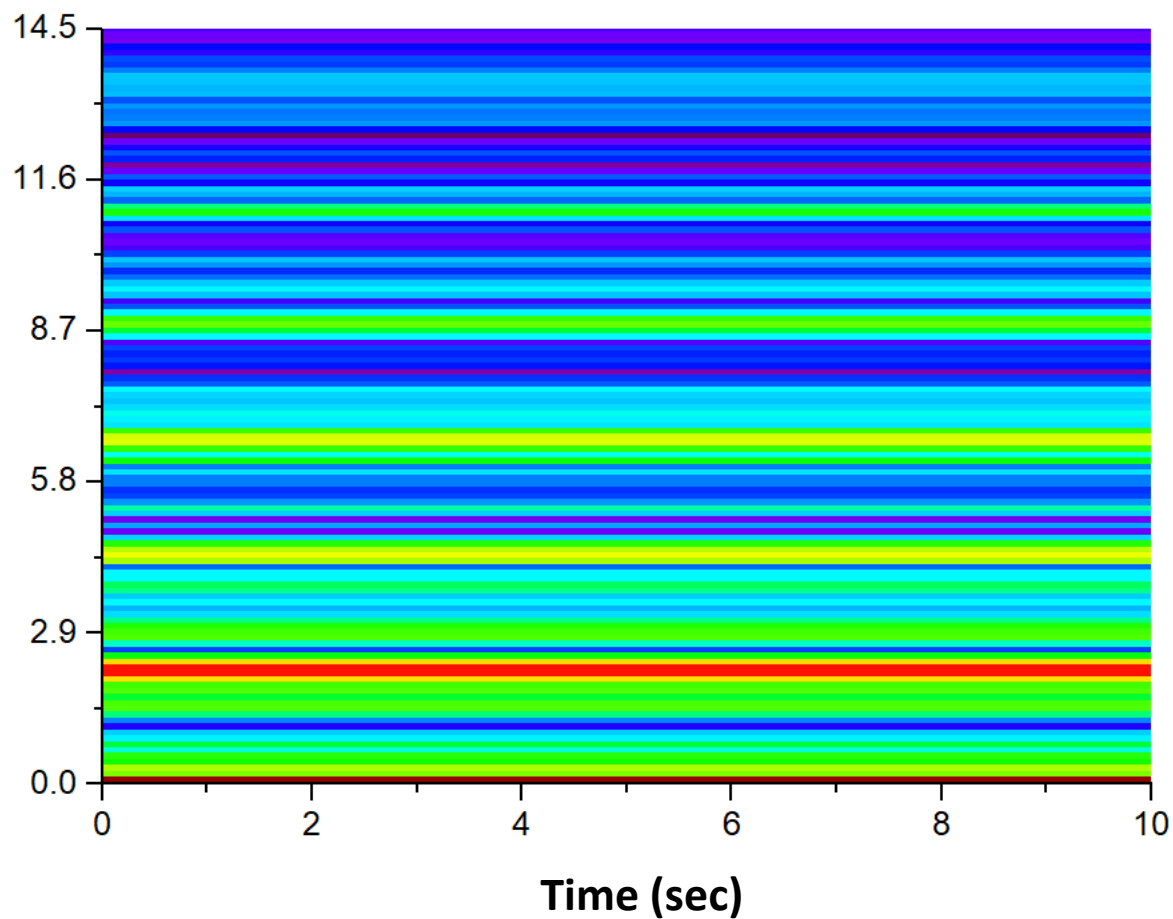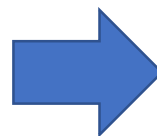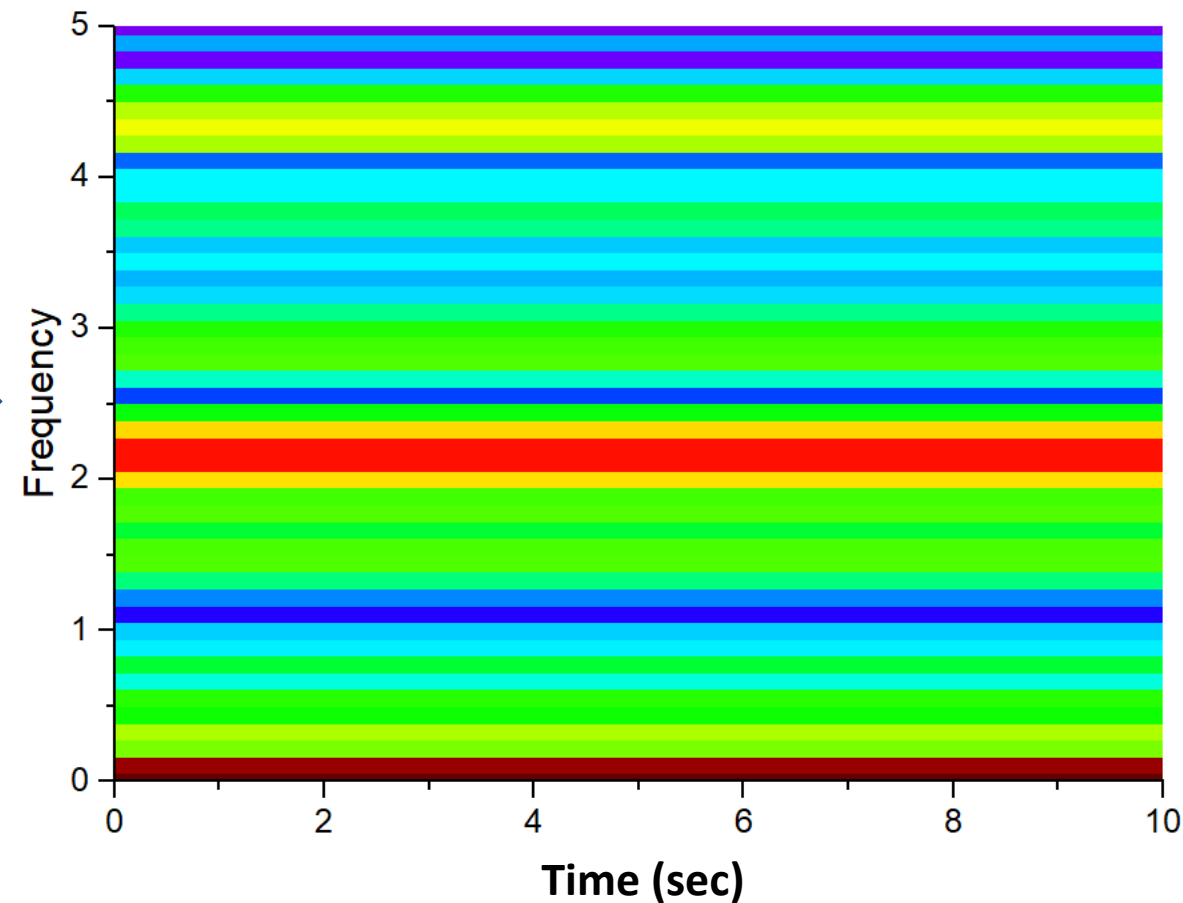

# Use Peak Analyzer to detect the peak interval

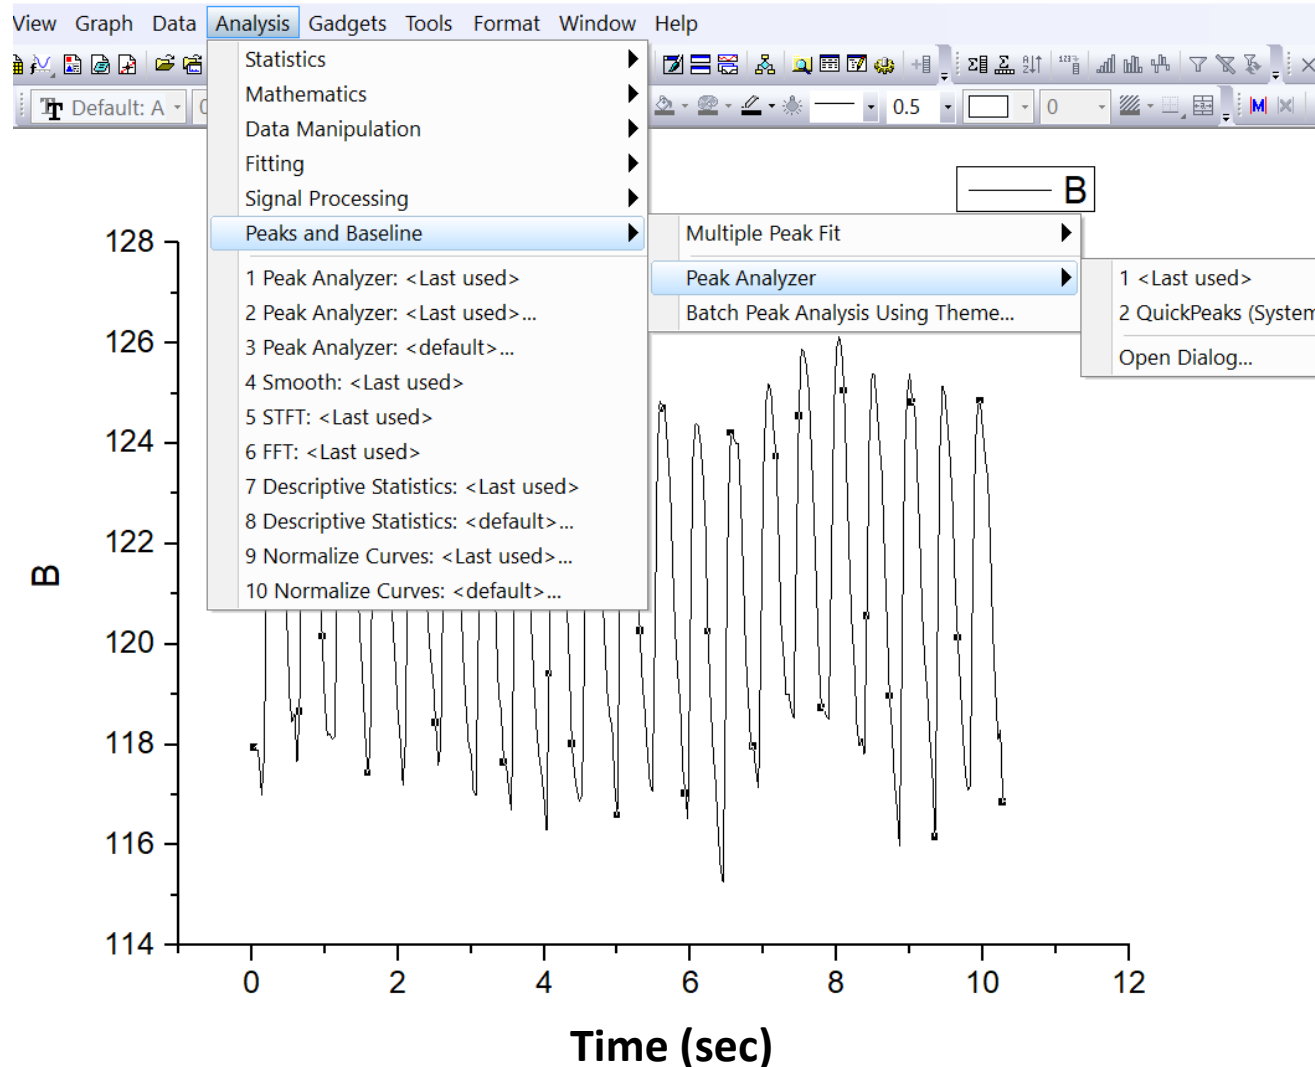

- After select graphic, in tool box, use **Analysis -> Peaks and Baseline -> Peak Analyzer** -> Open Dialog (for new setup) or Last used (for previous setup)

# Setting up Peak Analyzer

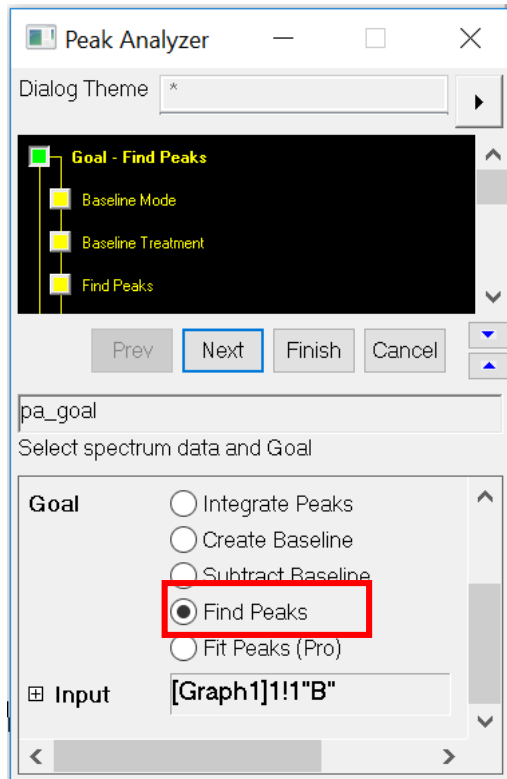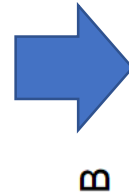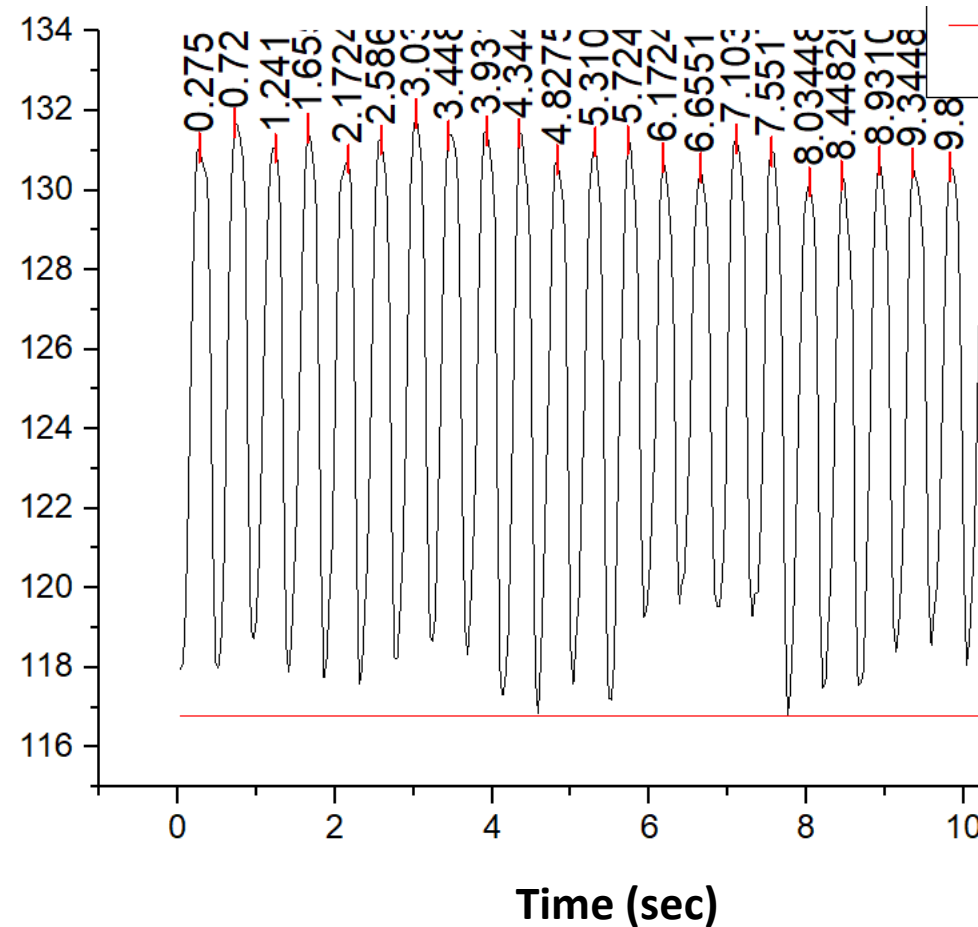

- To obtain time and intensity of each peak, we use "Find Peaks" function

# Merge atrium and ventricle rhythm

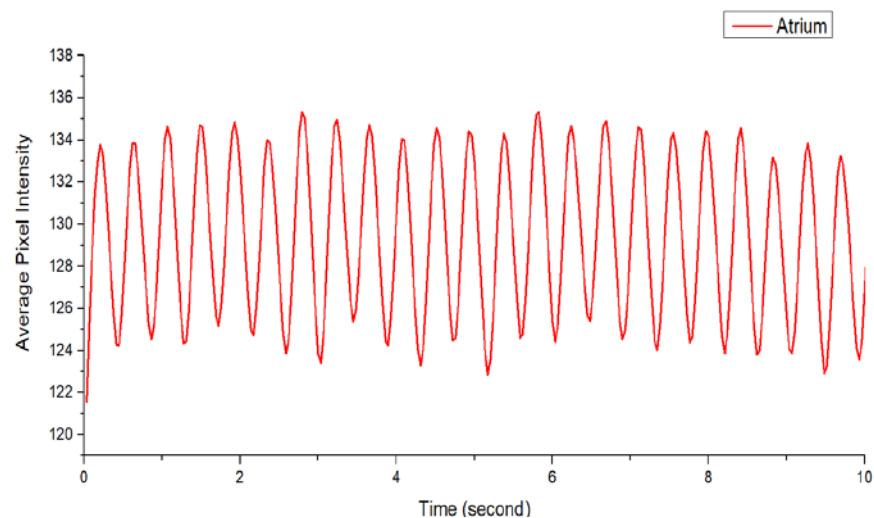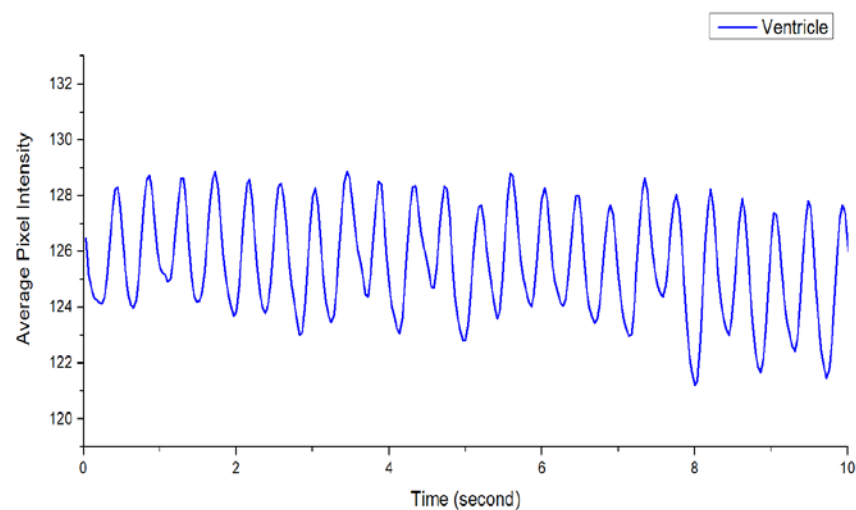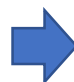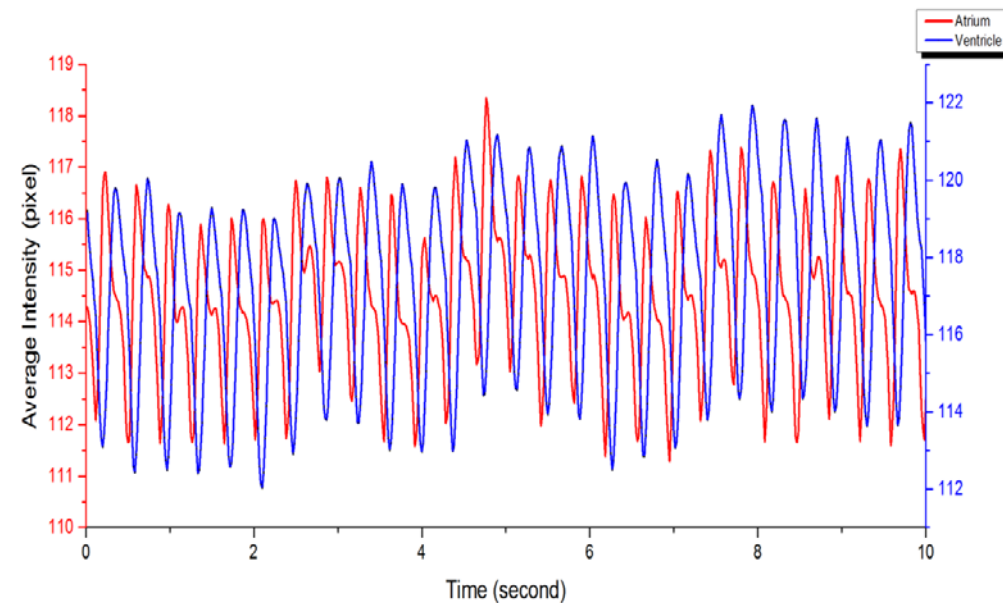

# Copy the Data for Further Analysis

|           | pcx(X)            | pcy(Y)            |
|-----------|-------------------|-------------------|
| Long Name | X                 | Y                 |
| Units     |                   |                   |
| Comments  | Peak Centers of B | Peak Centers of B |
| F(x)      |                   |                   |
| 1         | 0.27586           | 131.0714          |
| 2         | 0.72414           | 131.6807          |
| 3         | 1.24138           | 131.063           |
| 4         | 1.65517           | 131.563           |
| 5         | 2.17241           | 130.7899          |
| 6         | 2.58621           | 131.2689          |
| 7         | 3.03448           | 131.9286          |
| 8         | 3.44828           | 131.3782          |
| 9         | 3.93103           | 131.4874          |
| 10        | 4.34483           | 131.4328          |
| 11        | 4.82759           | 130.7731          |
| 12        | 5.31034           | 131.2143          |
| 13        | 5.72414           | 131.2605          |
| 14        | 6.17241           | 130.8151          |
| 15        | 6.65517           | 130.5714          |
| 16        | 7.10345           | 131.2899          |
| 17        | 7.55172           | 130.9748          |
| 18        | 8.03448           | 130.2143          |
| 19        | 8.44828           | 130.3698          |
| 20        | 8.93103           | 130.7395          |
| 21        | 9.34483           | 130.6807          |
| 22        | 9.82759           | 130.5966          |
| 23        |                   |                   |
| 24        |                   |                   |
| 25        |                   |                   |
| 26        |                   |                   |

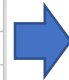

| 1  | Time    | PeakA0m  |
|----|---------|----------|
| 2  | 0.27586 | 131.0714 |
| 3  | 0.72414 | 131.6807 |
| 4  | 1.24138 | 131.063  |
| 5  | 1.65517 | 131.563  |
| 6  | 2.17241 | 130.7899 |
| 7  | 2.58621 | 131.2689 |
| 8  | 3.03448 | 131.9286 |
| 9  | 3.44828 | 131.3782 |
| 10 | 3.93103 | 131.4874 |
| 11 | 4.34483 | 131.4328 |
| 12 | 4.82759 | 130.7731 |
| 13 | 5.31034 | 131.2143 |
| 14 | 5.72414 | 131.2605 |
| 15 | 6.17241 | 130.8151 |
| 16 | 6.65517 | 130.5714 |
| 17 | 7.10345 | 131.2899 |
| 18 | 7.55172 | 130.9748 |
| 19 | 8.03448 | 130.2143 |
| 20 | 8.44828 | 130.3698 |
| 21 | 8.93103 | 130.7395 |
| 22 | 9.34483 | 130.6807 |

- Minimize the graphic and open the sheet
- Change the window into **Peak\_Centers**
- Copy X and Y data and paste into **Excel**.
- X as the **peak time** and Y as **peak intensity**



# Insert New Column in Excel

|    |         |          |  |
|----|---------|----------|--|
| 1  | Time    | Peak     |  |
| 2  | 0.27586 | 131      |  |
| 3  | 0.72414 | 131      |  |
| 4  | 1.24138 | 13       |  |
| 5  | 1.65517 | 13       |  |
| 6  | 2.17241 | 130      |  |
| 7  | 2.58621 | 131      |  |
| 8  | 3.03448 | 131      |  |
| 9  | 3.44828 | 131      |  |
| 10 | 3.93103 | 131      |  |
| 11 | 4.34483 | 131      |  |
| 12 | 4.82759 | 130      |  |
| 13 | 5.31034 | 131      |  |
| 14 | 5.72414 | 131      |  |
| 15 | 6.17241 | 130      |  |
| 16 | 6.65517 | 130.5714 |  |
| 17 | 7.10345 | 131.2899 |  |
| 18 | 7.55172 | 130.9748 |  |
| 19 | 8.03448 | 130.2143 |  |
| 20 | 8.44828 | 130.3698 |  |
| 21 | 8.93103 | 130.7395 |  |
| 22 | 9.34483 | 130.6807 |  |

- Insert new column between time and peak to calculate time interval



# Calculate Time Interval

|    | A       | B          | C        | D | E |
|----|---------|------------|----------|---|---|
| 1  | Time    | Time Inter | PeakA0m  |   |   |
| 2  | 0.27586 | =A3-A2     | 131.0714 |   |   |
| 3  | 0.72414 |            | 131.6807 |   |   |
| 4  | 1.24138 |            | 131.063  |   |   |
| 5  | 1.65517 |            | 131.563  |   |   |
| 6  | 2.17241 |            | 130.7899 |   |   |
| 7  | 2.58621 |            | 131.2689 |   |   |
| 8  | 3.03448 |            | 131.9286 |   |   |
| 9  | 3.44828 |            | 131.3782 |   |   |
| 10 | 3.93103 |            | 131.4874 |   |   |
| 11 | 4.34483 |            | 131.4328 |   |   |
| 12 | 4.82759 |            | 130.7731 |   |   |
| 13 | 5.31034 |            | 131.2143 |   |   |
| 14 | 5.72414 |            | 131.2605 |   |   |
| 15 | 6.17241 |            | 130.8151 |   |   |
| 16 | 6.65517 |            | 130.5714 |   |   |
| 17 | 7.10345 |            | 131.2899 |   |   |
| 18 | 7.55172 |            | 130.9748 |   |   |
| 19 | 8.03448 |            | 130.2143 |   |   |
| 20 | 8.44828 |            | 130.3698 |   |   |
| 21 | 8.93103 |            | 130.7395 |   |   |
| 22 | 9.34483 |            | 130.6807 |   |   |

|    | A       | B        | C        |
|----|---------|----------|----------|
| 10 | 3.93103 | 0.4138   | 131.4874 |
| 11 | 4.34483 | 0.48276  | 131.4328 |
| 12 | 4.82759 | 0.48275  | 130.7731 |
| 13 | 5.31034 | 0.4138   | 131.2143 |
| 14 | 5.72414 | 0.44827  | 131.2605 |
| 15 | 6.17241 | 0.48276  | 130.8151 |
| 16 | 6.65517 | 0.44828  | 130.5714 |
| 17 | 7.10345 | 0.44827  | 131.2899 |
| 18 | 7.55172 | 0.48276  | 130.9748 |
| 19 | 8.03448 | 0.4138   | 130.2143 |
| 20 | 8.44828 | 0.48275  | 130.3698 |
| 21 | 8.93103 | 0.4138   | 130.7395 |
| 22 | 9.34483 | 0.48276  | 130.6807 |
| 23 | 9.82759 | -9.82759 | 130.5966 |

- In time interval column, use formula: =(A3-A2) or two time point that want to be analysed
- Drag down the formula and delete the last calculation as it will show false result



# Calculate Time Interval and Beat per Minute

|    | A       | B                  | C        |
|----|---------|--------------------|----------|
| 10 | 3.93103 | 0.4138             | 131.4874 |
| 11 | 4.34483 | 0.48276            | 131.4328 |
| 12 | 4.82759 | 0.48275            | 130.7731 |
| 13 | 5.31034 | 0.4138             | 131.2143 |
| 14 | 5.72414 | 0.44827            | 131.2605 |
| 15 | 6.17241 | 0.48276            | 130.8151 |
| 16 | 6.65517 | 0.44828            | 130.5714 |
| 17 | 7.10345 | 0.44827            | 131.2899 |
| 18 | 7.55172 | 0.48276            | 130.9748 |
| 19 | 8.03448 | 0.4138             | 130.2143 |
| 20 | 8.44828 | 0.48275            | 130.3698 |
| 21 | 8.93103 | 0.4138             | 130.7395 |
| 22 | 9.34483 | 0.48276            | 130.6807 |
| 23 | 9.82759 |                    | 130.5966 |
| 24 |         |                    |          |
| 25 |         |                    |          |
| 26 |         | =AVERAGE(B2:B25)   |          |
| 27 |         | AVERAGE(number1, [ |          |

|    | A       | B        | C        |
|----|---------|----------|----------|
| 10 | 3.93103 | 0.4138   | 131.4874 |
| 11 | 4.34483 | 0.48276  | 131.4328 |
| 12 | 4.82759 | 0.48275  | 130.7731 |
| 13 | 5.31034 | 0.4138   | 131.2143 |
| 14 | 5.72414 | 0.44827  | 131.2605 |
| 15 | 6.17241 | 0.48276  | 130.8151 |
| 16 | 6.65517 | 0.44828  | 130.5714 |
| 17 | 7.10345 | 0.44827  | 131.2899 |
| 18 | 7.55172 | 0.48276  | 130.9748 |
| 19 | 8.03448 | 0.4138   | 130.2143 |
| 20 | 8.44828 | 0.48275  | 130.3698 |
| 21 | 8.93103 | 0.4138   | 130.7395 |
| 22 | 9.34483 | 0.48276  | 130.6807 |
| 23 | 9.82759 |          | 130.5966 |
| 24 |         |          |          |
| 25 |         |          |          |
| 26 |         | 0.454844 |          |
| 27 |         | =60/B26  |          |

- Calculate average time interval by using the formula: **=AVERAGE(B2:B25)** or the average of selected time interval
- Calculate the average heart rate (bpm) by using the formula: **=60/average time interval**



# Combine all the data in Excel

|    |      |          |          |                               |                              |                        |          |          |          |          |          |          |   |   |   |   |    |                 |
|----|------|----------|----------|-------------------------------|------------------------------|------------------------|----------|----------|----------|----------|----------|----------|---|---|---|---|----|-----------------|
| L2 |      |          |          |                               |                              |                        |          |          |          |          |          |          | ⌵ | ⋮ | ✕ | ✓ | fx | =AVERAGE(B2:K2) |
|    | A    | B        | C        | D                             | E                            | F                      | G        | H        | I        | J        | K        | L        |   |   |   |   |    |                 |
| 1  |      | Fish1    | Fish2    | Fish3                         | Fish4                        | Fish5                  | Fish6    | Fish7    | Fish8    | Fish9    | Fish10   | Average  |   |   |   |   |    |                 |
| 2  | A0m  | 0.402299 | 0.422789 | 0.474549                      | 0.424288                     | 0.494828               | 0.467242 | 0.45156  | 0.416792 | 0.466338 | 0.536398 | 0.455708 |   |   |   |   |    |                 |
| 3  | A5m  | 0.422789 | 0.388966 | 0.472414                      | 0.488203                     | 0.482759               | 0.403735 | 0.505747 | 0.444992 | 0.488204 | 0.545639 | 0.464345 |   |   |   |   |    |                 |
| 4  | A10m | 0.45156  | 0.440439 | 0.517242                      | 0.55173                      | 0.534483               | 0.41979  | 0.542146 | 0.495463 | 0.51341  | 0.555781 | 0.502204 |   |   |   |   |    |                 |
| 5  | A15m | 0.491833 | 0.498276 | 0.545639                      | 0.662561                     | 0.509982               | 0.46798  | 0.577586 | 0.517242 | 0.545639 | 0.578094 | 0.539483 |   |   |   |   |    |                 |
| 6  | A20m | 0.471264 | 0.553752 | 0.630541                      | 0.650575                     | 0.536398               | 0.499093 | 0.616092 | 0.559838 | 0.625287 | 0.655172 | 0.579801 |   |   |   |   |    |                 |
| 7  | A25m | 0.477586 | 0.545639 | 0.634483                      | 0.669951                     | 0.577012               | 0.679045 | 0.625287 | 0.5625   | 0.616092 | 0.732759 | 0.612035 |   |   |   |   |    |                 |
| 8  | A30m | 0.484574 | 0.545977 | 0.625287                      | 0.627587                     | 0.672414               | 0.606896 | 0.645321 | 0.565923 | 0.593103 | 0.836991 | 0.620407 |   |   |   |   |    |                 |
| 9  |      |          |          |                               |                              |                        |          |          |          |          |          |          |   |   |   |   |    |                 |
| 10 | V0m  | 0.402759 | 0.422789 | 0.474549                      | 0.421289                     | 0.499093               | 0.467241 | 0.45156  | 0.416792 | 0.467242 | 0.535496 | 0.455881 |   |   |   |   |    |                 |
| 11 | V5m  | 0.424288 | 0.388965 | 0.471264                      | 0.547667                     | 0.509982               | 0.402299 | 0.501724 | 0.446634 | 0.486388 | 0.545639 | 0.472485 |   |   |   |   |    |                 |
| 12 | V10m | 0.456486 | 0.438871 | 1.030651                      | 0.58215                      | 0.536398               | 0.418291 | 0.542146 | 0.992337 | 0.515326 | 0.557809 | 0.607047 |   |   |   |   |    |                 |
| 13 | V15m | 0.605911 | 0.996552 | 1.091954                      | 1.374384                     | 0.543611               | 0.934866 | 1.155173 | 1.094828 | 1.090518 | 0.868965 | 0.975676 |   |   |   |   |    |                 |
| 14 | V20m | 0        | 0        | 0                             | 0                            | 0                      | 0        | 0        | 0        | 0        | 0        | 0        |   |   |   |   |    |                 |
| 15 | V25m | 0        | 0        | 0                             | 0                            | 0                      | 0        | 0        | 0        | 0        | 0        | 0        |   |   |   |   |    |                 |
| 16 | V30m | 0        | 0        | 0                             | 0                            | 0                      | 0        | 0        | 0        | 0        | 0        | 0        |   |   |   |   |    |                 |
| 17 |      |          |          |                               |                              |                        |          |          |          |          |          |          |   |   |   |   |    |                 |
| 18 |      |          |          |                               |                              |                        |          |          |          |          |          |          |   |   |   |   |    |                 |
| 19 |      |          |          |                               |                              |                        |          |          |          |          |          |          |   |   |   |   |    |                 |
| 20 |      |          |          |                               |                              |                        |          |          |          |          |          |          |   |   |   |   |    |                 |
| 21 |      |          |          |                               |                              |                        |          |          |          |          |          |          |   |   |   |   |    |                 |
| 22 |      |          |          |                               |                              |                        |          |          |          |          |          |          |   |   |   |   |    |                 |
|    | ⏪    | ⏩        | ...      | 5uM Astemizole BPM Chronology | 5uM Astemizole Time Interval | Control BPM Chronology | C        | ...      | ⊕        | ⋮        |          |          |   |   |   |   |    |                 |

- Combine all the data to make it easier to calculate the result

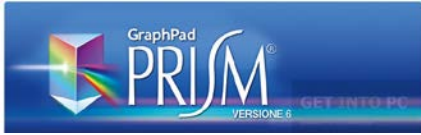

# Select Table & Graph Format

Welcome to GraphPad Prism

Column tables have one grouping variable, with each group defined by a column

|   | A       | B       |
|---|---------|---------|
| 1 | Control | Treated |
| 2 | Y       | Y       |

[Learn more](#)

**Enter/import data:**

- ☒ Enter replicate values, stacked into columns
- ☐ Enter paired or repeated measures data - each subject on a separate row
- ☐ Enter and plot error values already calculated elsewhere

Enter: Mean, SD, N

**Use sample data:**

- ☐ Frequency distribution data and histogram
- ☐ t test - Unpaired
- ☐ t test - Paired
- ☐ t test - One sample
- ☐ One-way ANOVA - Ordinary
- ☐ One-way ANOVA - Repeated measures
- ☐ ROC curve
- ☐ More sample data sets...

**New Table & Graph**

- XY
- Column**
- Grouped
- Contingency
- Survival
- Parts of whole

**Existing File**

- Open a file
- LabArchives
- Clone a graph
- Graph portfolio

Prism Tips New version available Free update available

Cancel Create

Welcome to GraphPad Prism

Grouped tables have two grouping variables, one defined by columns and the other defined by rows

| Table format | A       |      |      | B       |      |      |
|--------------|---------|------|------|---------|------|------|
| Grouped      | Control |      |      | Treated |      |      |
|              | A:Y1    | A:Y2 | A:Y3 | B:Y1    | B:Y2 | B:Y3 |
| 1 Male       |         |      |      |         |      |      |
| 2 Female     |         |      |      |         |      |      |

[Learn more](#)

**Enter/import data:**

- ☐ Enter and plot a single Y value for each point
- ☐ Enter 2 replicate values in side-by-side subcolumns
- ☐ Enter and plot error values already calculated elsewhere

Enter: Mean, SD, N

**Use sample data:**

- ☐ Two-way ANOVA - Ordinary - two data sets
- ☐ Two-way ANOVA - Ordinary - three data sets
- ☐ RM two-way ANOVA - matched values stacked
- ☐ RM two-way ANOVA - matched values in same row
- ☐ Grouped bar graph - Entering replicate data
- ☐ Grouped bar graph - Entering preaveraged data
- ☐ Two-way ANOVA - Ordinary

**New Table & Graph**

- XY
- Column
- Grouped**
- Contingency
- Survival
- Parts of whole

**Existing File**

- Open a file
- LabArchives
- Clone a graph
- Graph portfolio

Prism Tips New version available Free update available

Cancel Create

- For **endpoint analysis** use “Column”
- For **time chronology analysis** use “Grouped”



# Copy the results from Excel to GraphPad Prism

[illegible]



# Create Graph from The Data

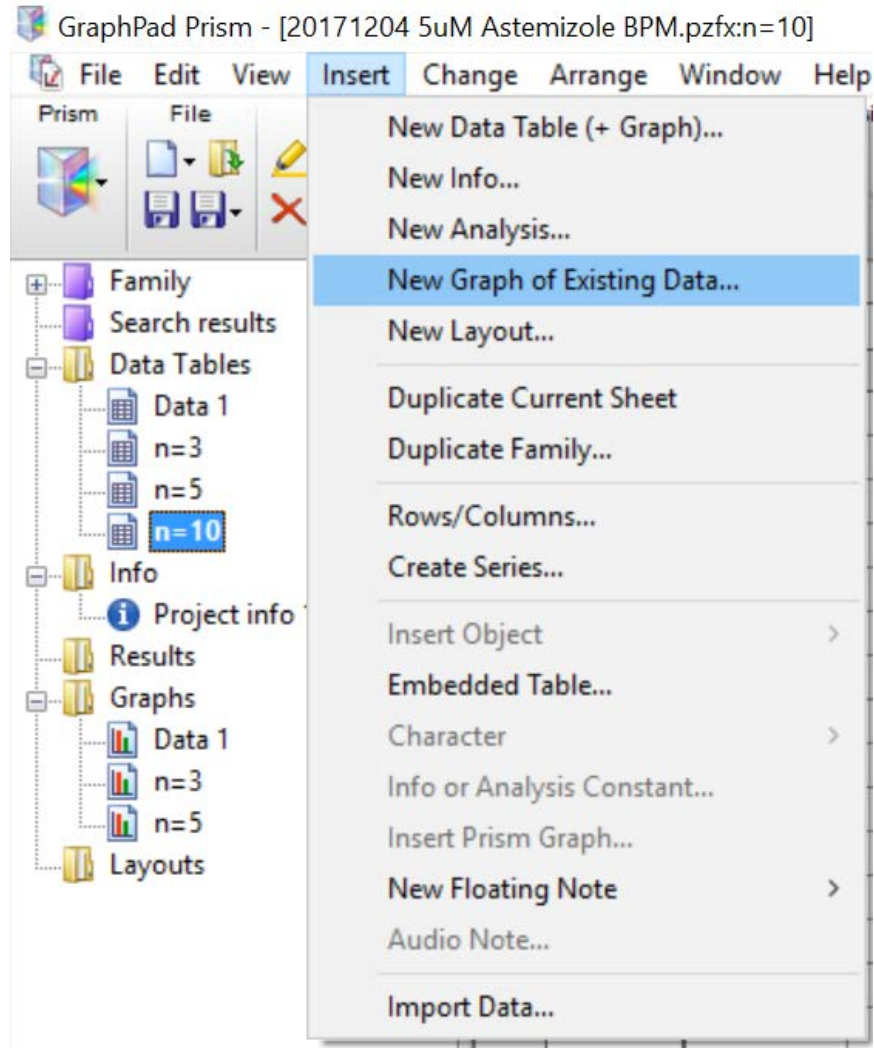

- Click Insert -> New Graph of Existing Data

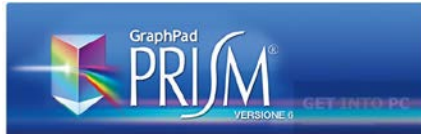

# Select Plot Summary Data Type

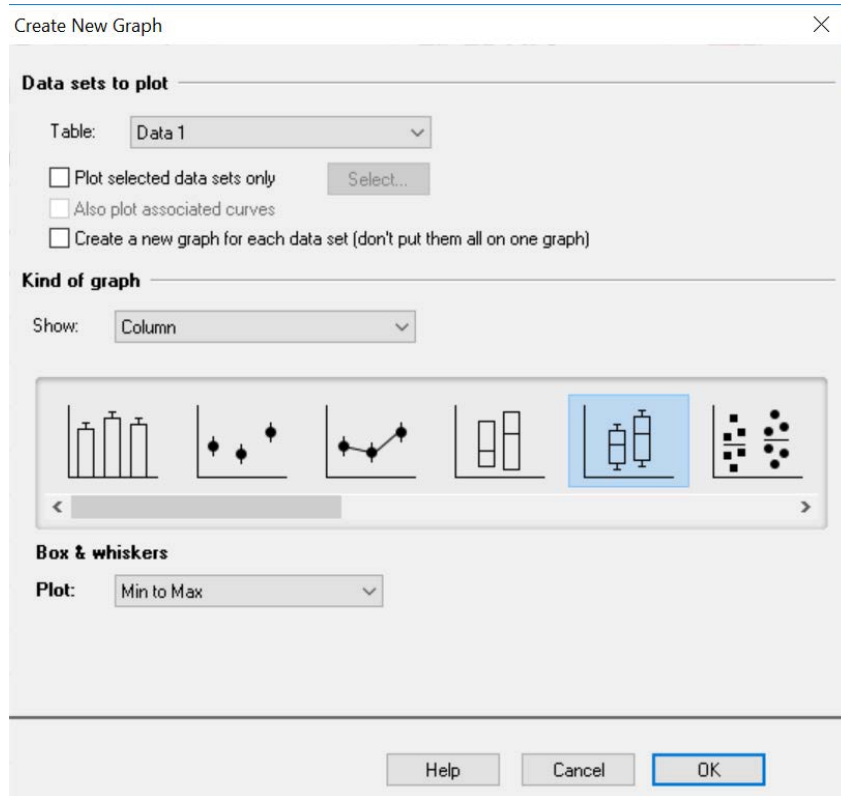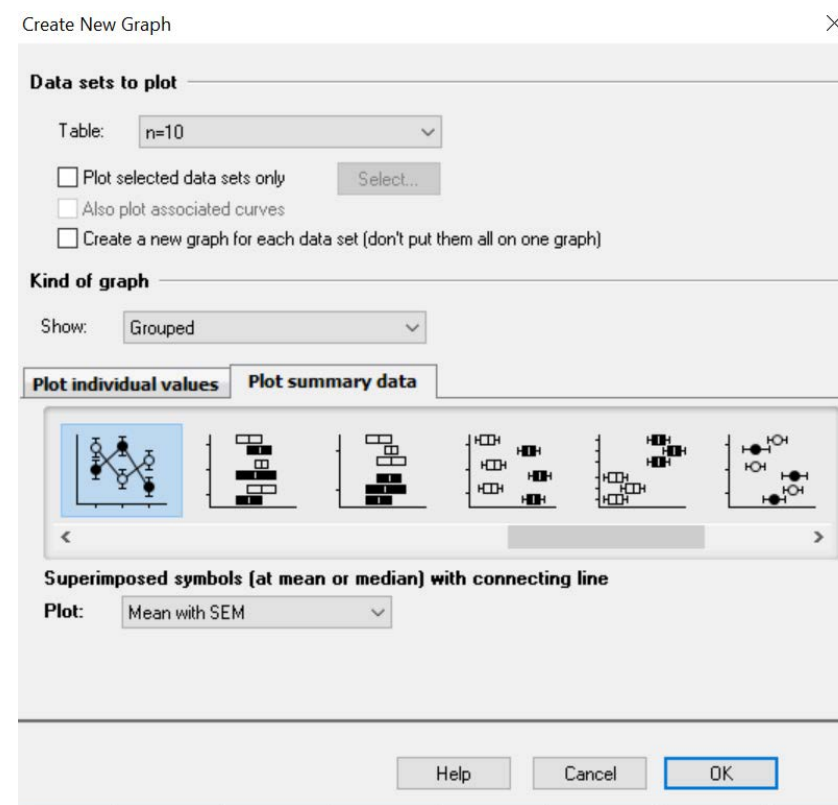

- For **endpoint analysis** use min to max plot (left)
- For **time chronology analysis** use Mean with SEM (right)

# Select Plot Summary Data Type

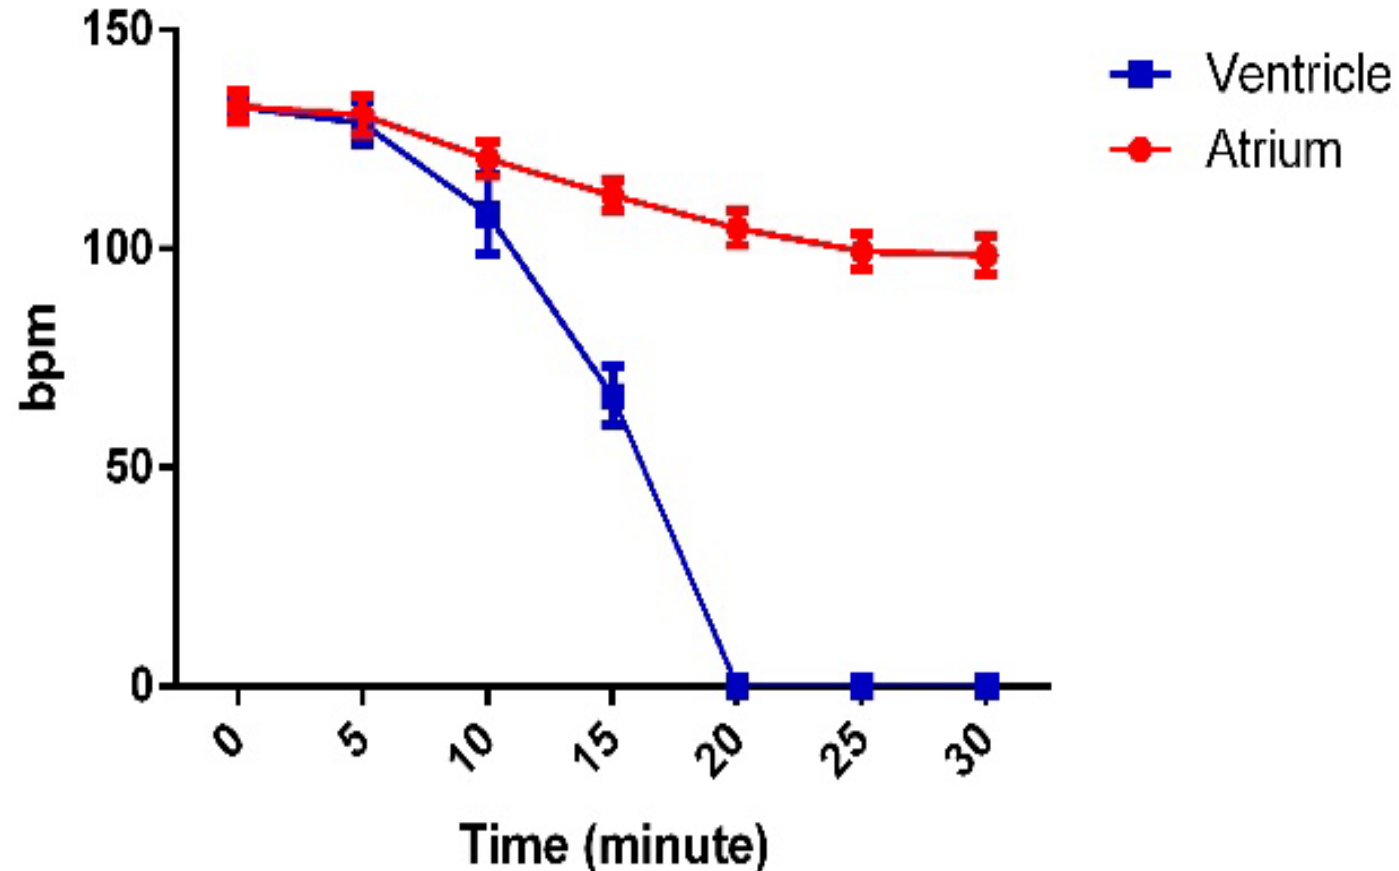

- This data is time chronology analysis of cardiac rhythm after 5uM astemizole treatment in zebrafish embryos aged at 72 hpf
