# Supplementary material
Source: MDPI journal article supplement (https://www.mdpi.com/2411-5134/3/2/21)

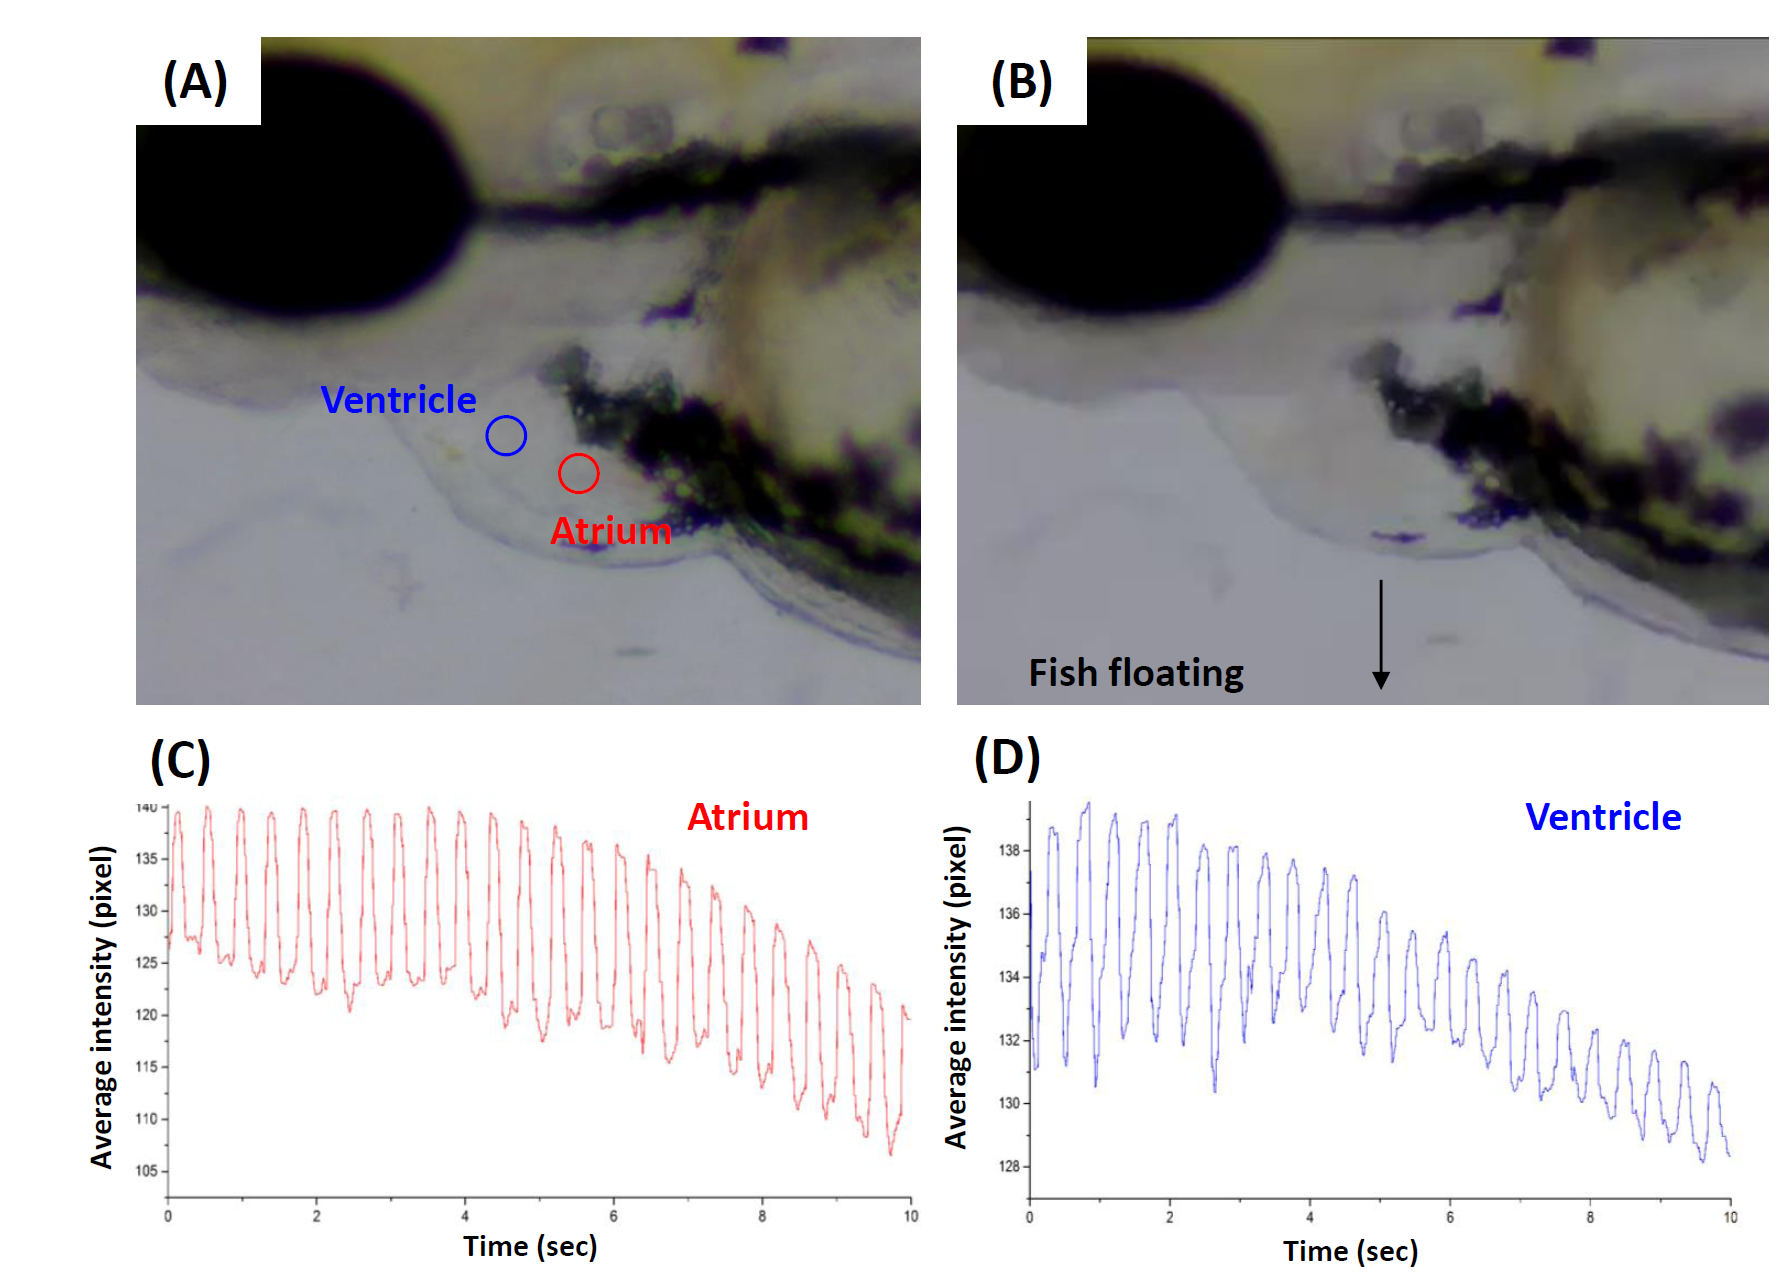

Supplement: s1 [file s1 › Figure S1.png]
